# Supplementary material for: Supramolecular Immobilization of Adamantyl and Carboxylate Modified N-Heterocyclic Carbene Ligand on Cucurbituril Substrates
Source: MDPI journal article supplement (doi:10.3390/molecules27051662), 2022-03-03
Supplement: s1 [file s1]

## Supplementary Materials

# Supramolecular Immobilization of Adamantyl and Carboxylate Modified *N*-Heterocyclic Carbene Ligand on Cucurbituril Substrates

Hamidou Keita

Departments of Chemistry, Clemson University, Clemson, SC 29634, USA

### 1. Experimental section

#### 1.1. General synthetic considerations

1H-benzo[d]imidazole-5,6-dicarboxylic acid (**2**) and dimethyl 1H-benzo[d]imidazole-5,6-dicarboxylate (**3**) were prepared as previously described<sup>28,29</sup>. All other materials were of reagent quality and used as received. All solvents used were HPLC grade. <sup>1</sup>H and <sup>13</sup>C{<sup>1</sup>H} NMR spectra were recorded using a Bruker 500 MHz spectrometer. Chemical shifts  $\delta$  (in ppm) for <sup>1</sup>H and <sup>13</sup>C NMR are referenced to SiMe<sub>4</sub> using the residual protio-solvent as an internal standard. For <sup>1</sup>H NMR: CDCl<sub>3</sub>, 7.26 ppm; DMSO-*d*<sub>6</sub>, 2.50 ppm, CD<sub>3</sub>OD, 3.31ppm. For <sup>13</sup>C NMR: CDCl<sub>3</sub>, 77.16 ppm; DMSO-*d*<sub>6</sub>, 39.52 ppm. Coupling constants (*J*) are expressed in hertz (Hz). Infrared spectra were recorded with 1 cm<sup>-1</sup> resolution on a Shimadzu IRAffinity-1S spectrometer. Elemental analyses were performed at Atlantic Microlab, Inc. (Norcross, GA). All reactions were performed under an inert atmosphere under an N<sub>2</sub> atmosphere using standard Schlenk or glovebox techniques with the exclusion of light. All subsequent manipulations were performed under ambient conditions using standard benchtop techniques without the exclusion of light. When required, solvents were dried and deoxygenated using an Innovative Technologies solvent purification system, and then stored over molecular sieves (3 Å) in a drybox. For X-ray characterization, the structure was solved and refined using Bruker SHELXTL Software. The ruthenium complex was characterized with UV-VIS spectrophotometer (Shimadzu UV-2600).

#### Synthesis of 1H-benzo[d]imidazole-5,6-dicarboxylic acid (BDCOOH) (**2**)

In a 2L conical flask, 5,6-dimethylbenzimidazole (8.00g, 0.0547mol) was added followed by 140ml (1:1 v/v) of water and tert-butanol and the mixture was heated to 70°C for 15min while stirring. To the homogenous solution, KMnO<sub>4</sub> (86.40g, 0.547mol) dissolved in 600ml water at 70°C was added in 20ml portions over 4hr period. The temperature of the reaction mixture was maintained at 70°C throughout. After 4hr, the heat was turned off and 30.00g (0.238mol) sodium sulfite was added in 5 portions and the hot mixture was stirred for 30mins and filtered. The black cake was washed with 100ml boiling water. The filtrate was concentrated to 300 mL and diluted to 600ml with distilled water. To the cooled solution, 120ml (2:1 v/v) acetic acid and water mixture was added to form white precipitate which was filtered and dried. A white solid (6.06g, 29.4mmol, 54%). <sup>1</sup>H NMR (DMSO-*d*<sub>6</sub>):  $\delta$  12.64 (s, 1H), 8.51(s, 1H), 7.90 (s, 1H). <sup>13</sup>C NMR (DMSO-*d*<sub>6</sub>):  $\delta$  169.5, 145.7, 138.4, 128.2, 116.5.<sup>28</sup>

#### Synthesis of dimethyl 1H-benzo[d]imidazole-5,6-dicarboxylate (BDCOAc) (**3**)

In a 500ml RBF, **2** (4.0g, 19.42mmol) was suspended in 200ml methanol and 4ml conc. H<sub>2</sub>SO<sub>4</sub> was added. The reaction mixture was reflux for 16hr. After the reaction, the solvent was evaporated and the viscous liquid was neutralized with 6M K<sub>2</sub>CO<sub>3</sub> until precipitate

ceased forming. 200ml DCM was added and extracted. The organic layer was then evaporated to dryness. A white solid (4.03g, 17.22mmol, 89% ). MP 148.0-151.3°C. <sup>1</sup>H NMR (500MHz, CDCl<sub>3</sub>): δ 10.89 (br s, 1H), 8.22 (s, 1H), 8.03 (s, 2H), 3.93 (s, 6H). <sup>13</sup>C NMR (300MHz, CDCl<sub>3</sub>): δ 168.78, 144.18, 138.96, 126.96, 117.19, 52.83. ATR-IR: ν 2950 (vw), 2590 (w), 1716 (s), 1623 (w), 1422 (w), 1296 (s), 1228 (s), 1148 (m), 1101 (m), 1043 (m), 958 (s), 910 (m), 862 (s), 777 (s), 695 (w), 634 (m) cm<sup>-1</sup>.<sup>29</sup>

**Synthesis of dimethyl 1-p-tolyl-1H-benzo[d]imidazole-5,6-dicarboxylate (BTol-IOAc) (4)**<sup>30</sup>

In a 500ml RBF, **3** (4.00g, 17.10mmol, 1eq) and p-tolylboronic acid (3.34g, 25.65mmol, 1.5eq) were dissolved in 190ml distilled methanol. To this solution, Cu(NO<sub>3</sub>)<sub>2</sub> (0.824g, 3.42mmol, 20mol%) and TMEDA (0.255mL, 1.71mmol, 10mol%) were added and stirred at room temperature for 16hr under oxygen. A dark blue solution was observed. After the reaction was completed as evident from TLC, the solvent was removed and the residue was dissolved in 100mL DCM and extracted with water (50mL x3). The crude product was then purified by flash column chromatography (SiO<sub>2</sub>, 90:10 CH<sub>2</sub>Cl<sub>2</sub>/MeOH) to afford a light yellow solid (5.36g, 16.54mmol, 96%) MP: 133.8-134.6°C, R<sub>f</sub> = 0.68. <sup>1</sup>H NMR (500MHz, CDCl<sub>3</sub>): δ 8.26 (s, 1H), 8.23 (s, 1H), 7.84 (s, 1H), 7.4-7.36 (m, 4H), 3.94 (s, 3H), 3.89 (s, 3H), 2.47 (s, 3H). <sup>13</sup>C NMR (500MHz, CDCl<sub>3</sub>): δ 168.55, 168.19, 145.61, 145.00, 139.16, 135.12, 132.74, 130.86, 128.07, 126.71, 124.25, 122.27, 112.06, 52.77, 52.72, 21.20. ATR-IR: ν 3062 (vw), 2950 (vw), 1718 (s), 1619 (vw), 1565 (vw), 1514 (m), 1432 (m), 1366 (m), 1299 (s), 1261 (s), 1224 (s), 1186 (s), 1139 (s), 1101 (s), 1035 (s), 968 (w), 902 (m), 817 (s), 770 (s), 713 (w). Ana. Calc. for C<sub>18</sub>H<sub>16</sub>N<sub>2</sub>O<sub>4</sub>: C, 66.66; H, 4.97; N, 8.64. Found: C, 66.77; H, 4.88; N, 8.54.

**Synthesis of 1-p-tolyl-1H-isobenzofuro[5,6-d]imidazole-5,7-dione (BTolAnh)(6)**

In a 50ml RBF, **4** (1.0g, 3.08mmol) and potassium hydroxide (375mg, 6.68mmol, 2.17eq) were suspended in 10ml Methanol/water (9:1). The reaction mixture formed homogenous light brown solution after stirring for 30mins at RT. The reaction was continued for 16h and then the solvent was evaporated. The viscous liquid was dissolved in minimum water and neutralized with 6M HCl to form a white precipitate. The precipitate was filtered and dried affording a white powder of 1-p-tolyl-1H-benzo[d]imidazole-5,6-dicarboxylic acid **5** (793mg, 2.68mmol, 87%). Without further purification, 1-p-tolyl-1H-benzo[d]imidazole-5,6-dicarboxylic acid **5** was used directly.

In a 50ml RBF equipped with condenser, **5** (834mg, 2.82mmol) and 9ml acetic anhydride were reflux for 2hr. The suspension formed homogenous solution after 10min of refluxing. After the reaction was completed, the light brown solution was cooled to room temperature and then in ice bath to form precipitate. The reaction mixture was filtered and the precipitate washed with diethyl ether to afford a beige powder of 1-p-tolyl-1H-isobenzofuro[5,6-d]imidazole-5,7-dione **6** (667mg, 2.40mmol, 85%). mp: 257.5-259.1°C. <sup>1</sup>H NMR (500MHz, CDCl<sub>3</sub>): δ 8.46 (s, 1H), 8.39 (s, 1H), 8.08 (s, 1H), 7.43 (dd, J=30.8Hz, 4H), 2.51 (s, 3H). <sup>13</sup>C NMR (500MHz, CDCl<sub>3</sub>): δ 163.31, 163.10, 149.16, 147.62, 140.22, 139.11, 131.91, 131.16, 126.06, 125.29, 124.42, 119.20, 109.16, 21.26. ATR-IR: ν 3101 (vw), 2920 (vw), 2863 (vw), 1836 (m), 1779 (s), 1602 (vw), 1516 (w), 1389 (vw), 1322 (m), 1303 (m), 1265 (m), 1217 (w), 1160 (w), 1068 (vw), 888 (s), 802 (w), 735 (s), 627 (m) cm<sup>-1</sup>. Ana. Calcd. for C<sub>16</sub>H<sub>10</sub>N<sub>2</sub>O<sub>3</sub>: C, 69.06; H, 3.62; N, 10.07. Found: C, 69.00; H, 3.74; N, 10.02.

**Synthesis of 6-adamantanemethyl-1-p-tolylimidazo [4,5-f]isoindole-5,7(1H,6H)-dione (BTadme) (7)**

Beige powder of **6** (0.95g, 3.4mmol) and adamantanemethylamine (0.56g, 3.4mmol, 1eq.) were placed in 250mL RBF under N<sub>2</sub>. Then 50mL acetic acid was added and reflux for 24hr. After completion of the reaction, the mixture was cooled down to RT and 50mL distilled water was added to form white precipitate. The precipitate was filtered and washed with water. The white solid obtained was recrystallized in methanol and dried to afford a white powder (1.30g, 3.06mmol, 90%) mp: 258.0-259.1°C. <sup>1</sup>H NMR (500MHz, CDCl<sub>3</sub>): δ 8.30 (s, 1H), 8.26 (s, 1H), 7.40 (dd, J=16, 8.5Hz, 4H), 3.41 (s, 2H), 2.49 (s, 3H), 1.96 (s, 3H), 1.68-1.58 (m, 12H). <sup>13</sup>C NMR (500MHz, CDCl<sub>3</sub>): δ 169.13, 169.10, 147.68, 145.61, 139.54, 137.54, 132.51, 130.93, 127.70, 126.79, 124.32, 116.78, 106.98, 49.84, 40.86, 36.75, 35.62, 28.30, 21.21. ATR-IR: ν 3082 (vw), 2906 (w), 2847 (vw), 1765 (w), 1706 (s), 1618 (vw), 1519

(m), 1392 (s), 1353 (m), 1210 (w), 1092 (w), 876 (w), 827 (m), 748 (s), 620 (m)  $\text{cm}^{-1}$ . Ana. Calcd. for  $\text{C}_{27}\text{H}_{27}\text{N}_3\text{O}_2$ : C, 76.21; H, 6.40; N, 9.87 Found: C, 75.97; H, 6.33; N, 9.78

### Synthesis of BToladBr (8)

Bromoacetic acid (409 mg, 0.96 mmol) and **7** (200mg, 1.44mmol) were dissolved with 15 mL of dried toluene in a 100 mL RBF equipped with condenser. The reaction mixture was reflux for overnight. After 16h, a white precipitate had formed. The reaction mixture was allowed to cool to room temperature and the precipitate was collected by centrifugation. The resulting solid was washed with 15 mL x 3 toluene and was then dried in vacuo to afford a white powder (519 mg, 0.922mmol, 95% yield). Mp: > 260°C.  $^1\text{H}$  NMR (500MHz,  $\text{CD}_3\text{OD}$ ):  $\delta$  10.21 (s, 1H), 8.4 (d, 0.5Hz, 1H), 8.22 (d, 1Hz, 1H), 7.77 (d, 8.5Hz, 2H), 7.64 (d, 8Hz, 2H), 5.71 (s, 2H), 3.44 (s, 2H), 2.57 (s, 3H), 1.97 (s, 3H), 1.77-1.61 (m, 12H).  $^{13}\text{C}$  NMR (300MHz,  $\text{CD}_3\text{OD}$ ):  $\delta$  167.20, 167.11, 167.08, 146.14, 142.21, 135.59, 135.01, 131.02, 130.84, 130.73, 130.05, 124.89, 110.26, 109.45, 49.94, 40.61, 36.39, 35.19, 28.36, 19.94. ATR-IR:  $\nu$  3159 (vw), 2893 (w), 2841 (vw), 1748 (w), 1709 (s), 1629 (vw), 1553 (w), 1430 (w), 1383 (m), 1343 (w), 1257 (vw), 1190 (m), 1169 (s), 1083 (m), 984 (vw), 830 (vw), 744 (m), 618 (s)  $\text{cm}^{-1}$ . Ana. Calcd. for  $\text{C}_{29}\text{H}_{30}\text{BrN}_3\text{O}_4 \cdot 0.3\text{H}_2\text{O}$ : C, 61.12; H, 5.41; N, 7.37. Found: C, 60.91; H, 5.28, N, 7.12.

FTIR spectrum of **2**

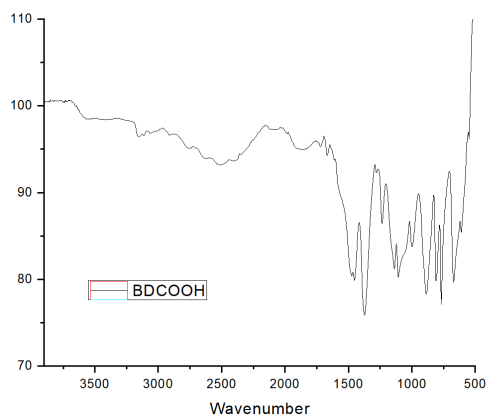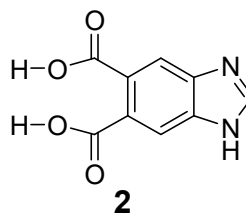

FTIR spectrum of **3**

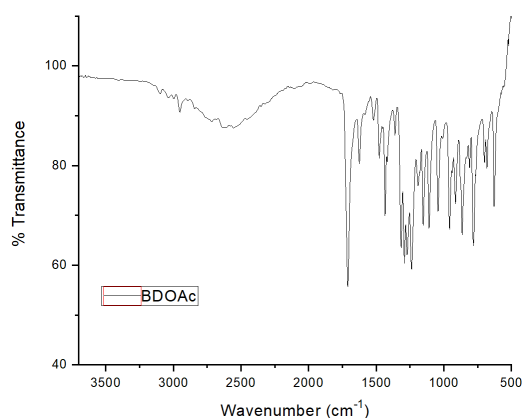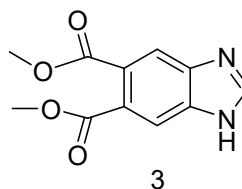

FTIR spectrum of **4**

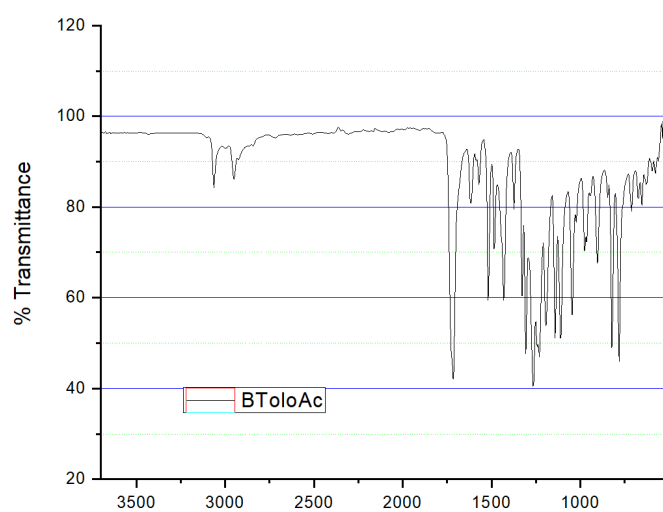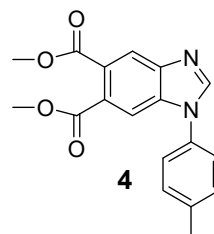

FTIR spectrum of **6**

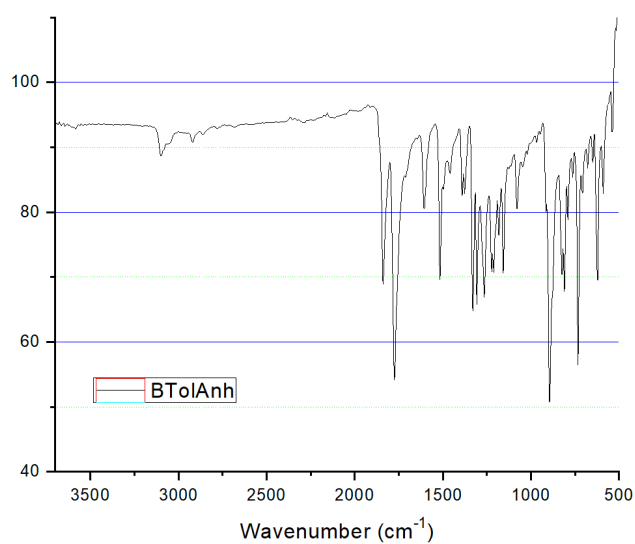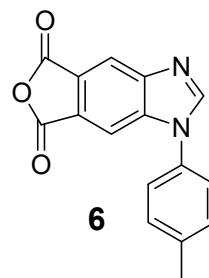

FTIR spectrum of **7**

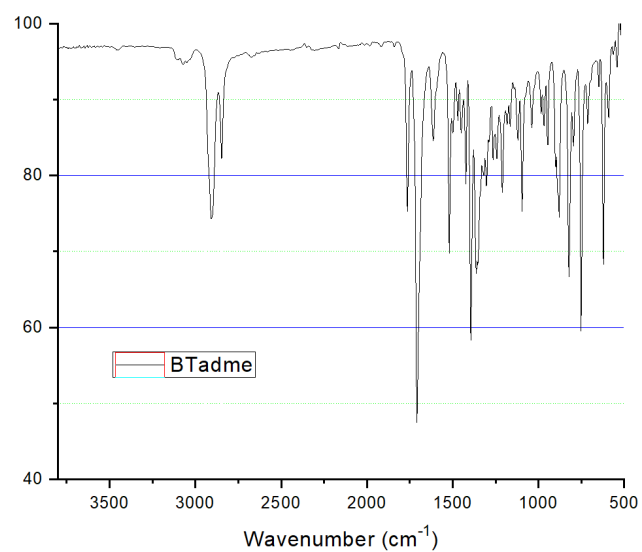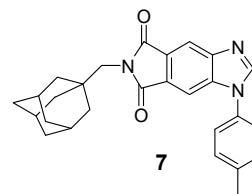

FTIR spectrum of **8**

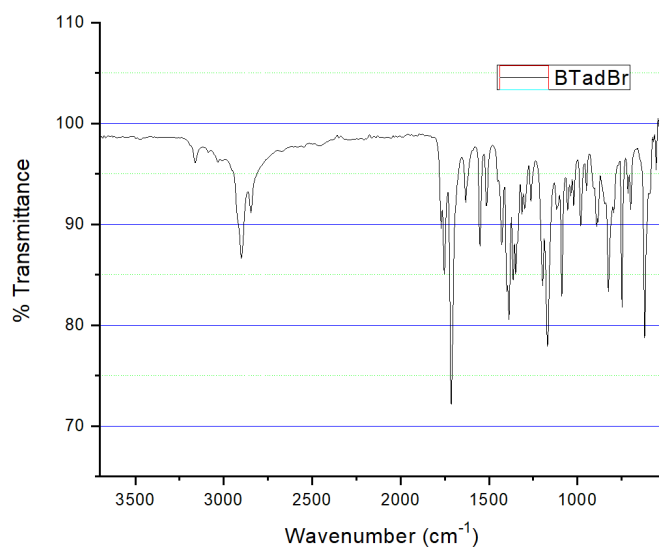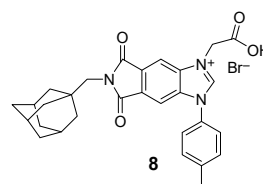

<sup>1</sup>H-NMR (DMSO-d<sub>6</sub>) spectrum of **2**

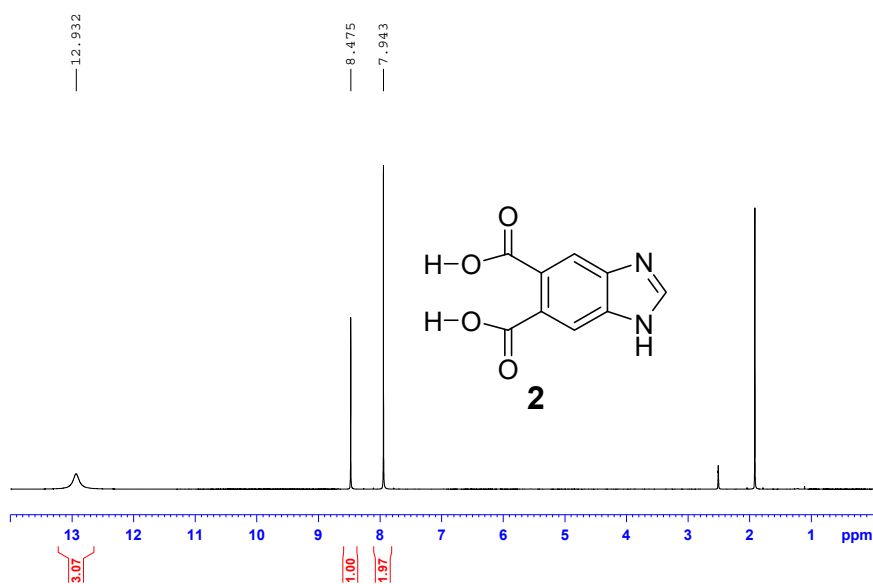

<sup>13</sup>C-NMR (DMSO-d<sub>6</sub>) spectrum of **2**

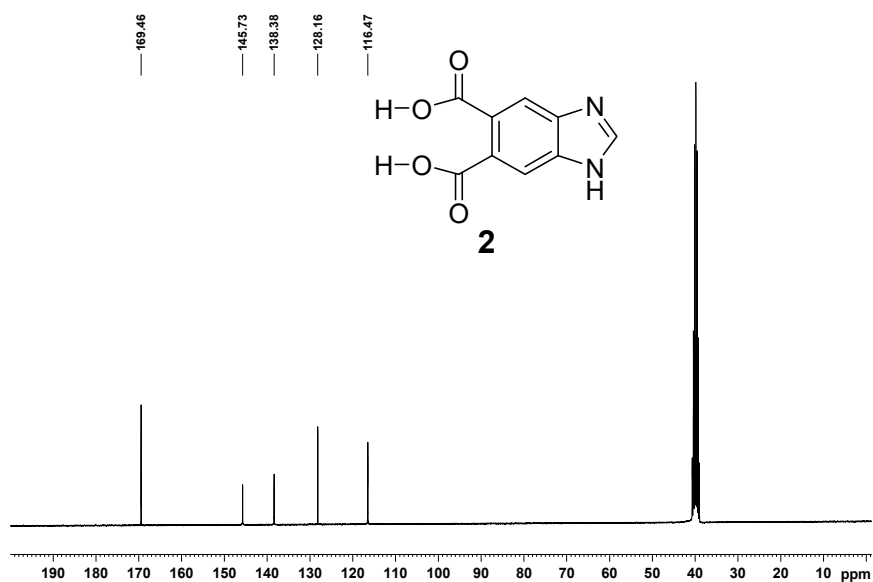

<sup>1</sup>H-NMR (CDCl<sub>3</sub>) spectrum of **3**

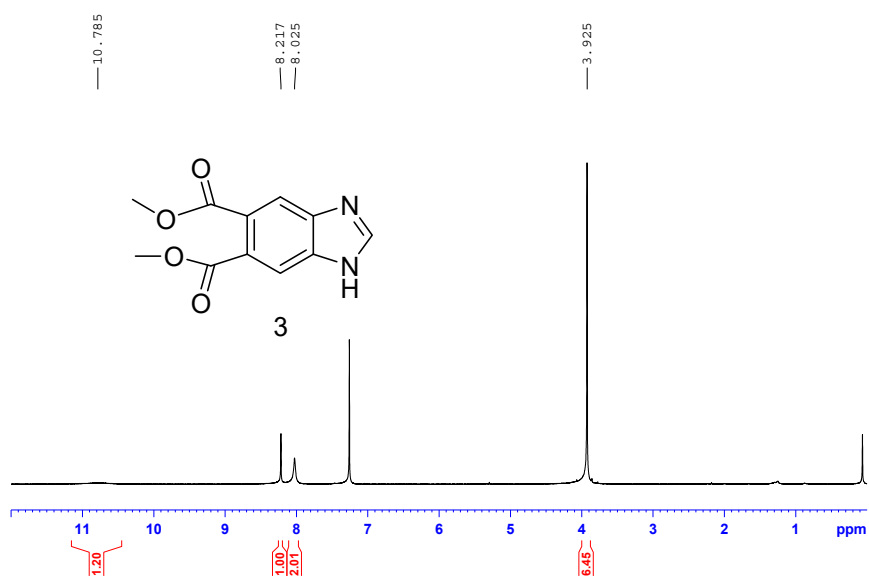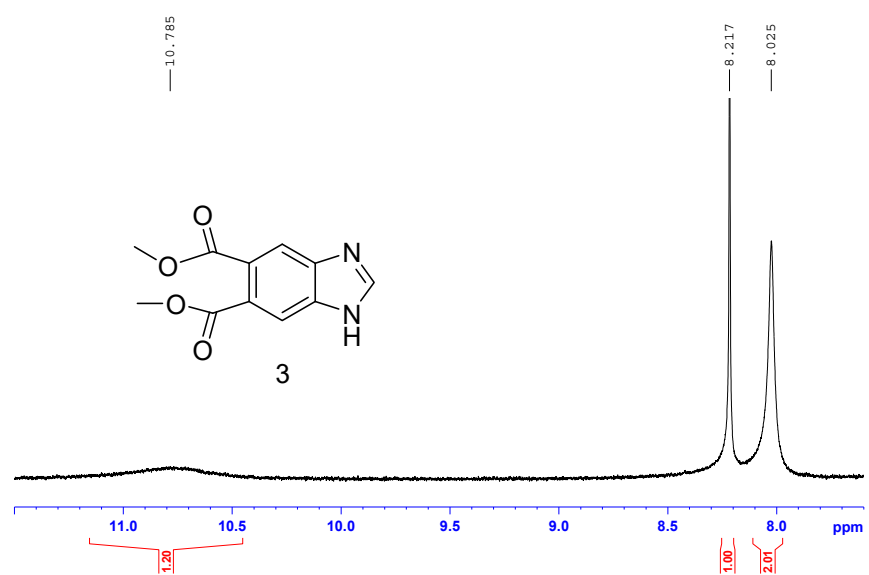

$^{13}\text{C}$ -NMR ( $\text{CDCl}_3$ ) spectrum of **3**

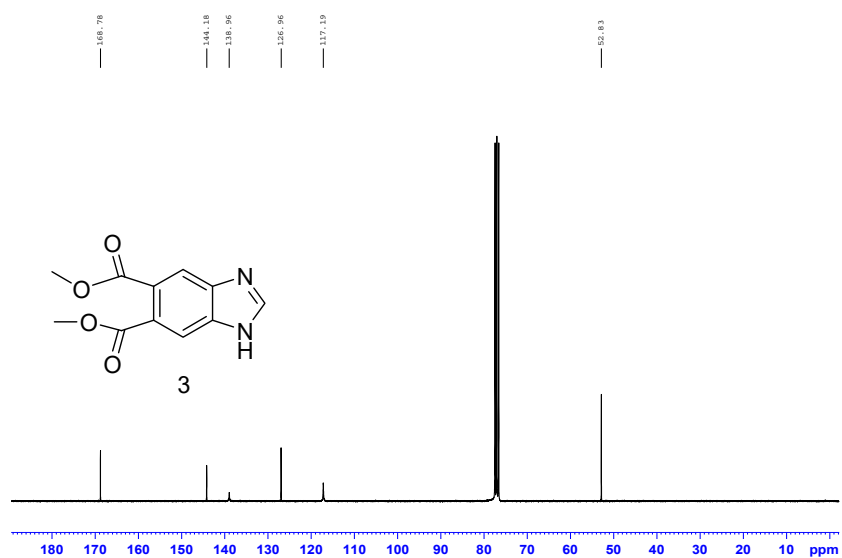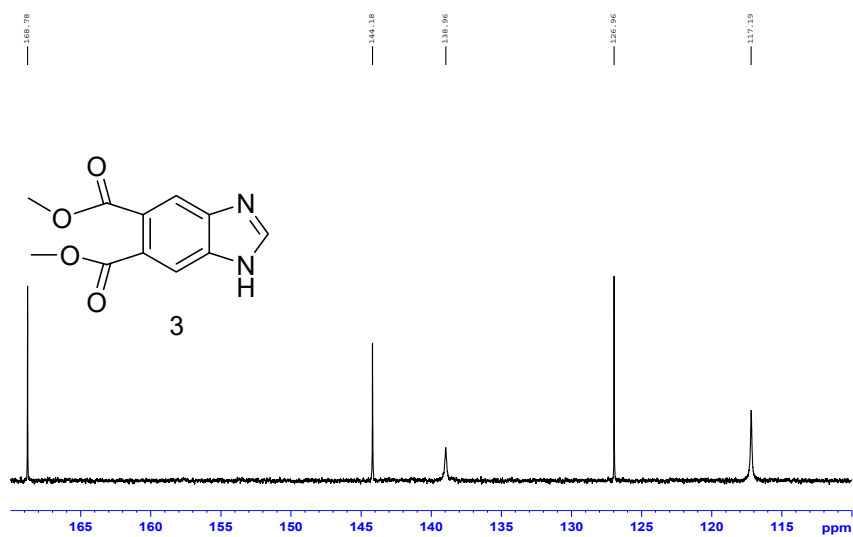



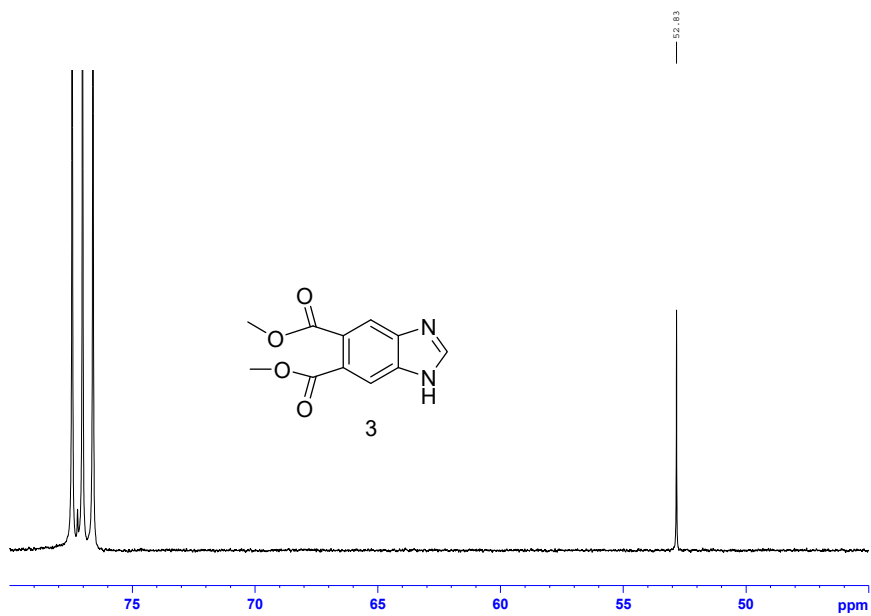

<sup>1</sup>H-NMR (CDCl<sub>3</sub>) spectrum of **4**

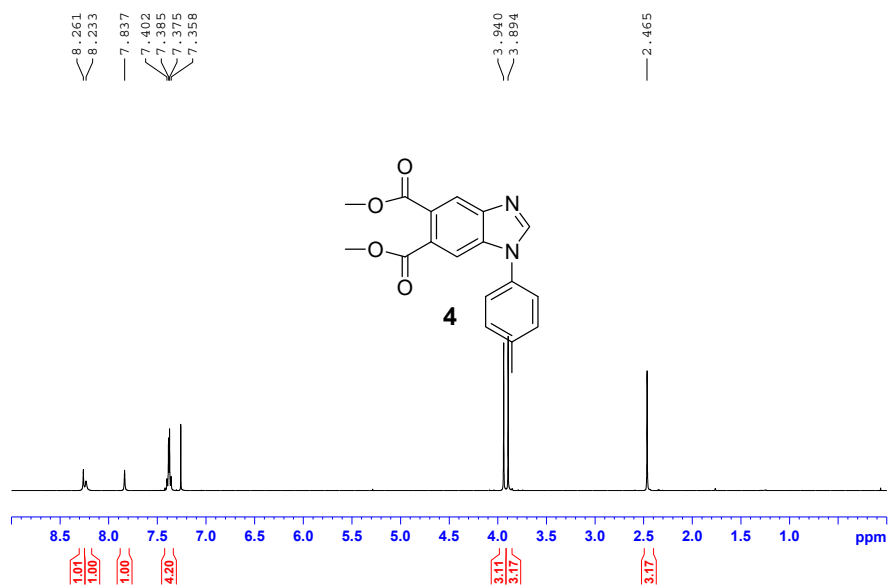

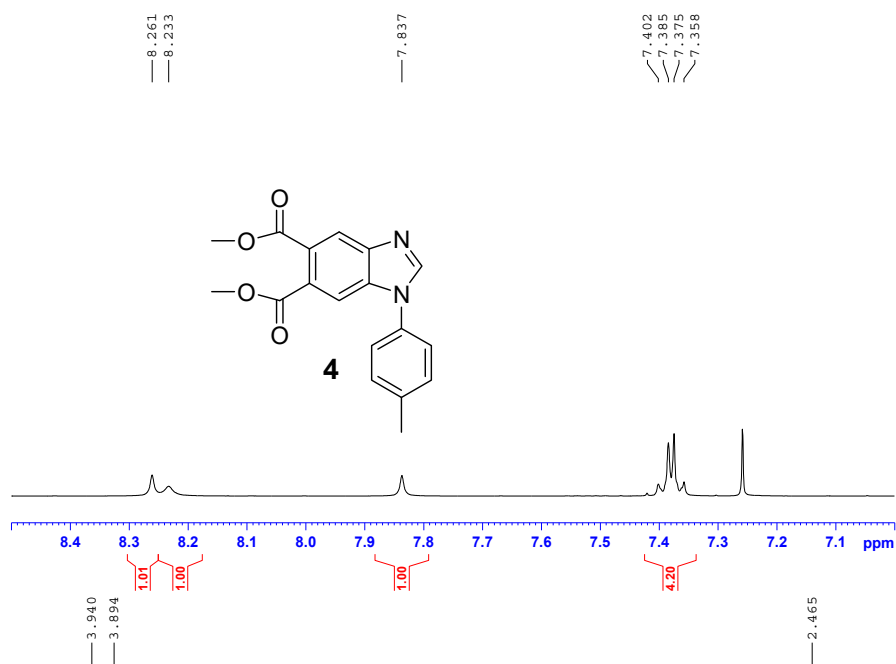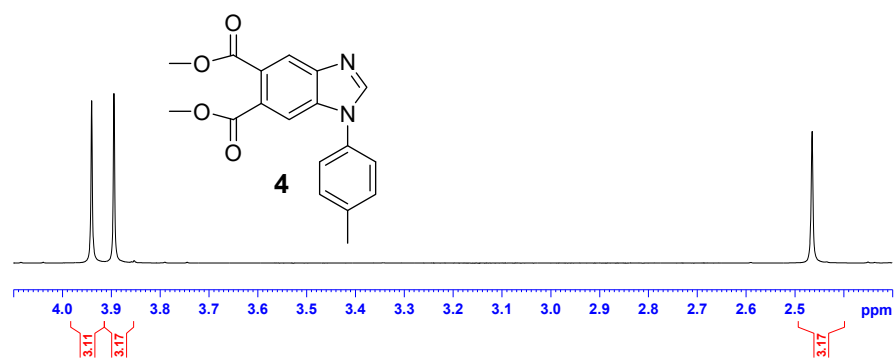

<sup>13</sup>C-NMR (CDCl<sub>3</sub>) spectrum of **4**

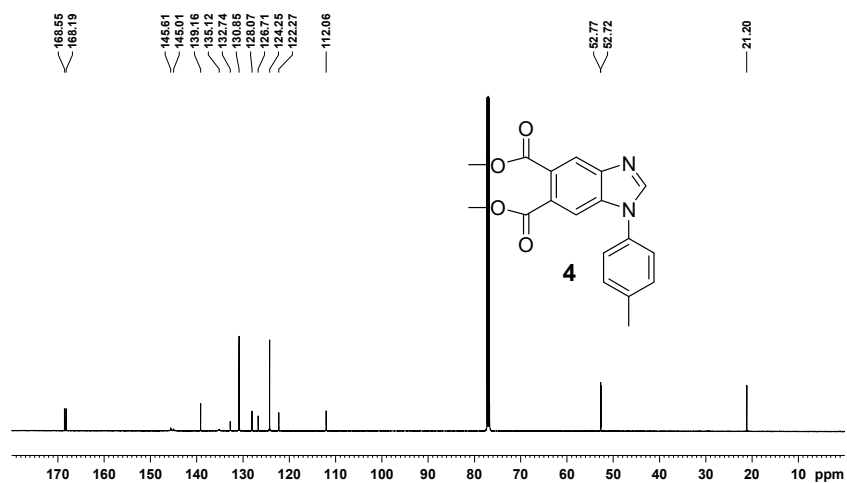



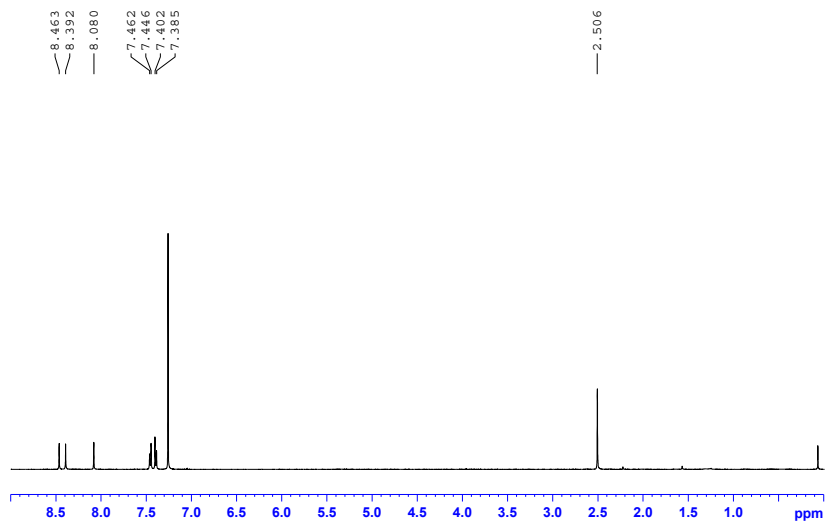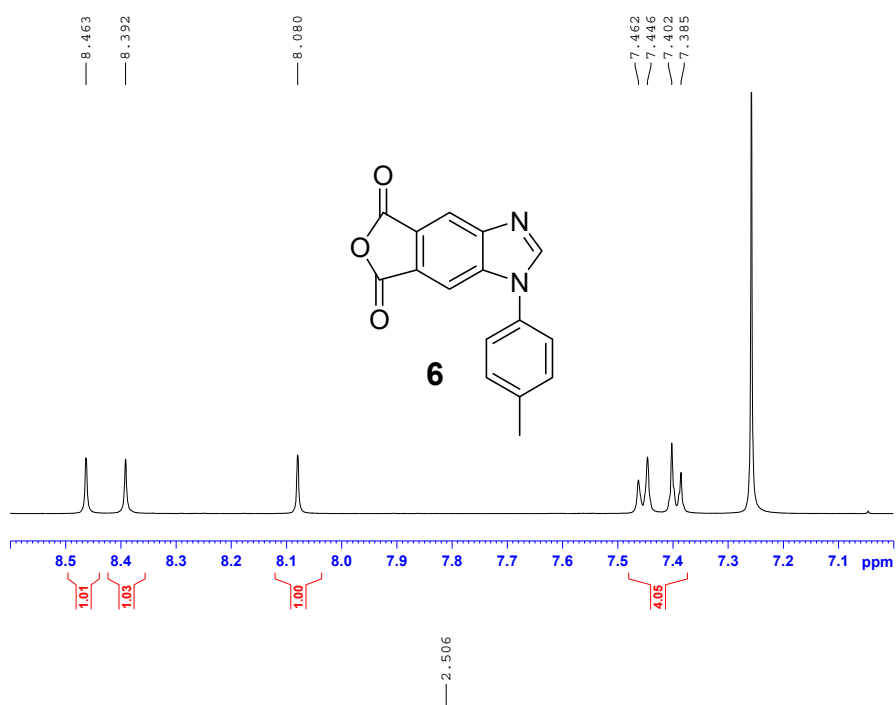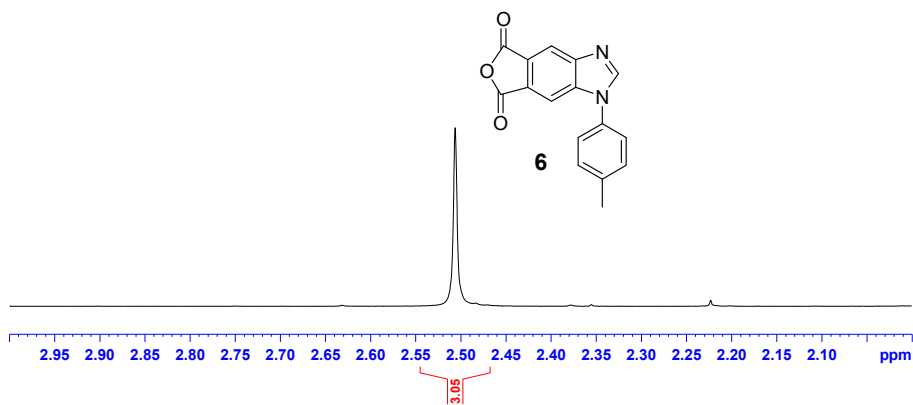

$^{13}\text{C}$ -NMR ( $\text{CDCl}_3$ ) spectrum of **6**

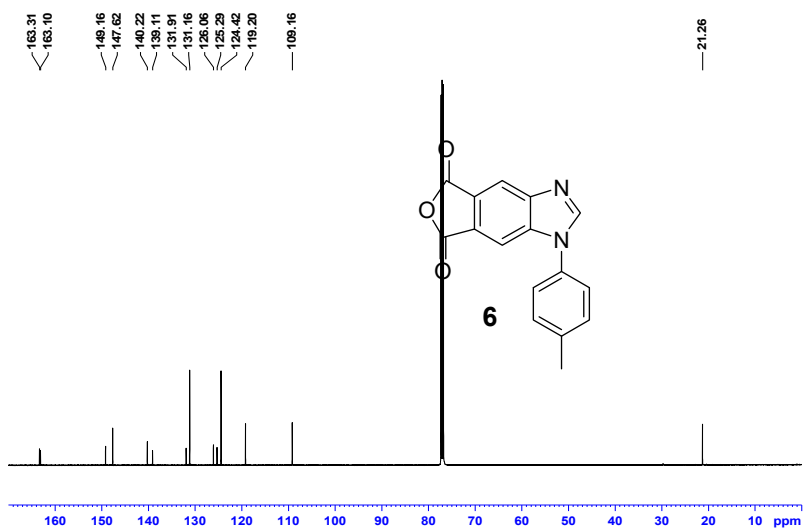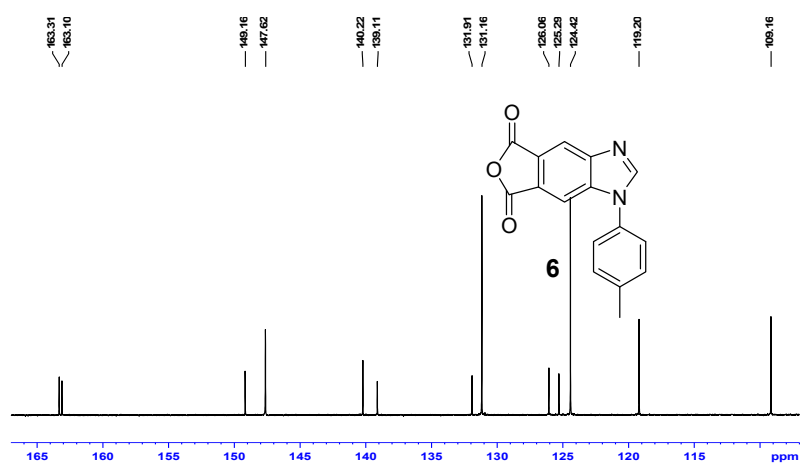

<sup>1</sup>H-NMR (CDCl<sub>3</sub>) spectrum of **7**

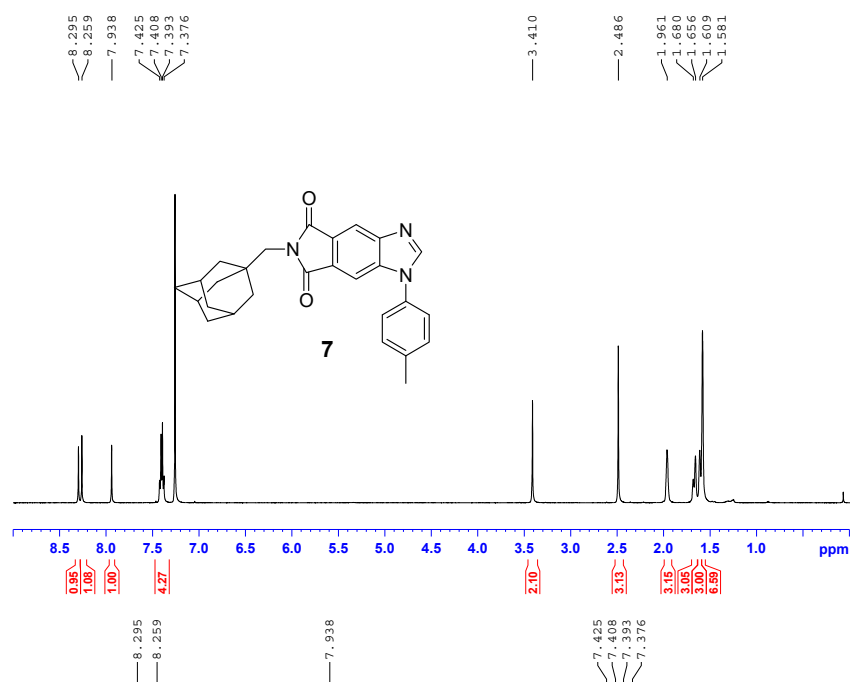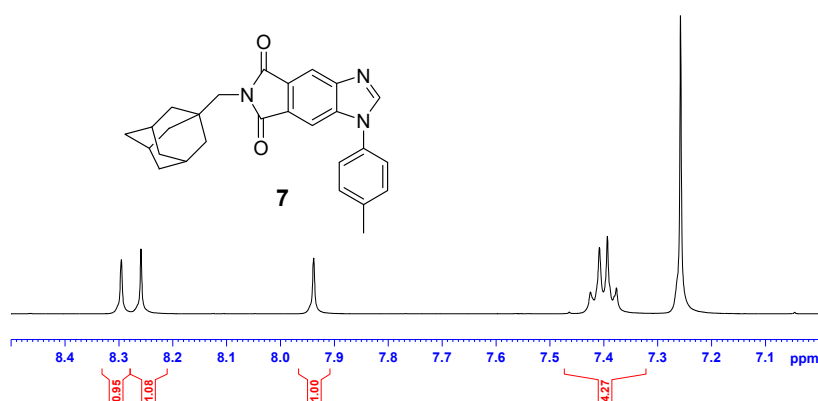



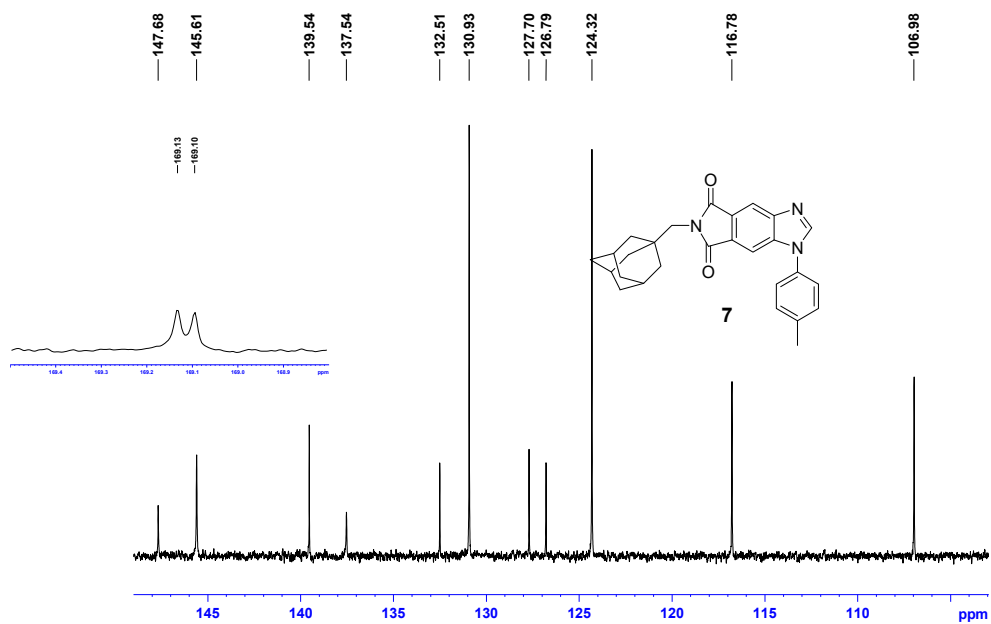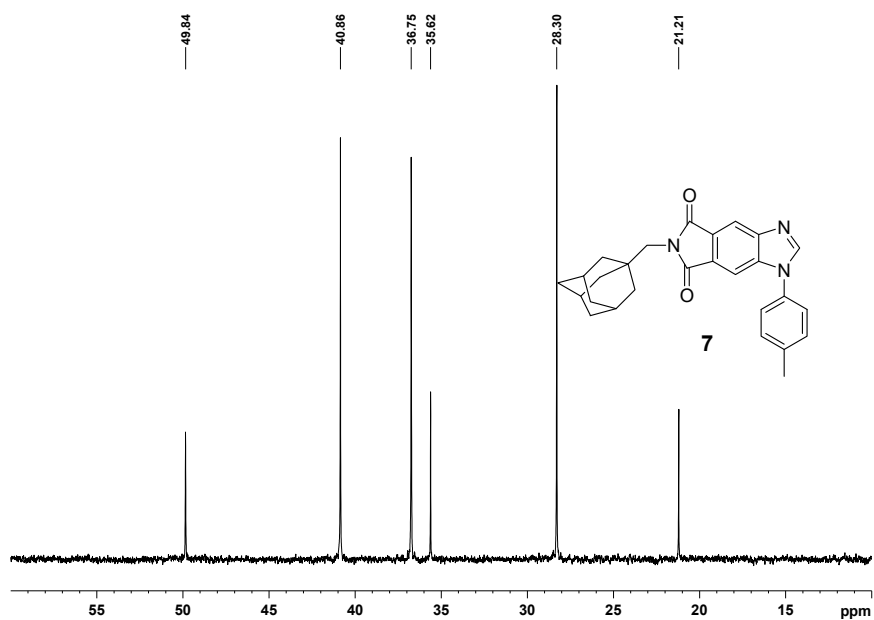



$^1\text{H}$ -NMR ( $\text{CD}_3\text{OD}$ ) spectrum of **8**

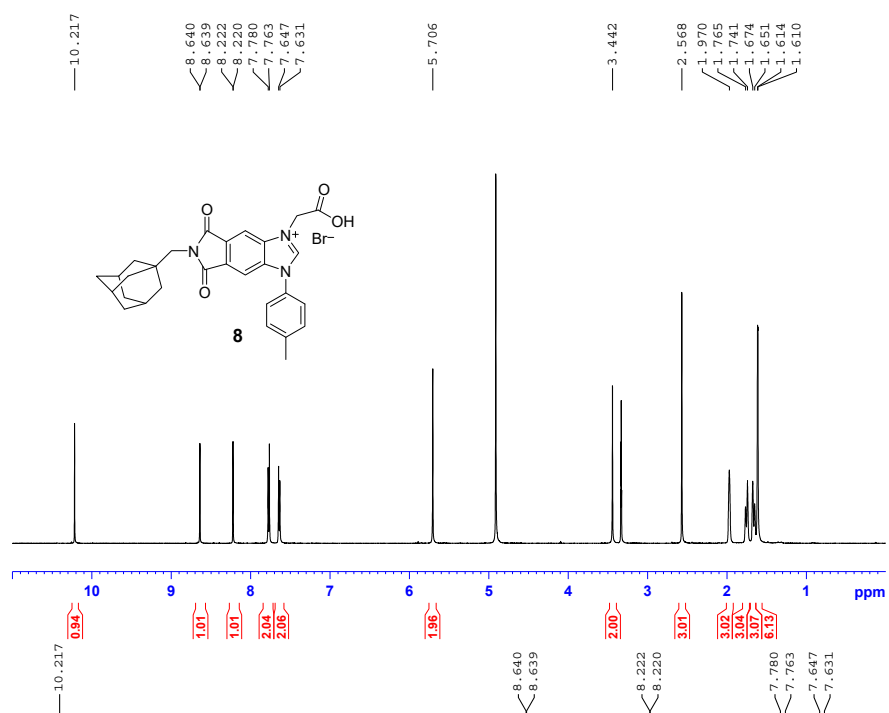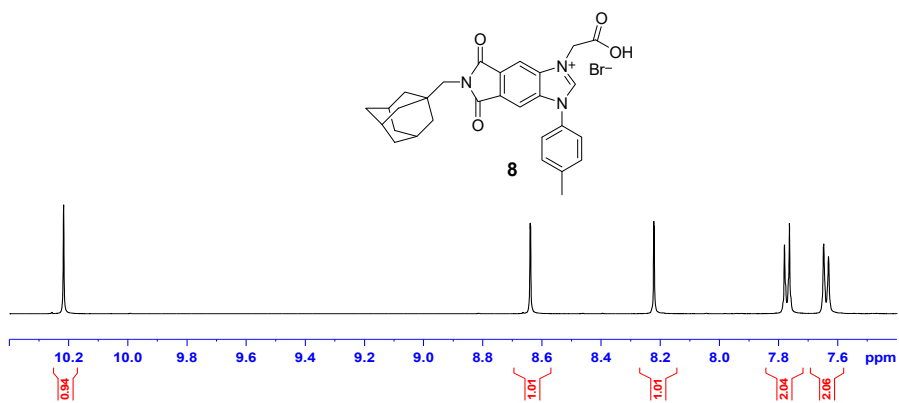

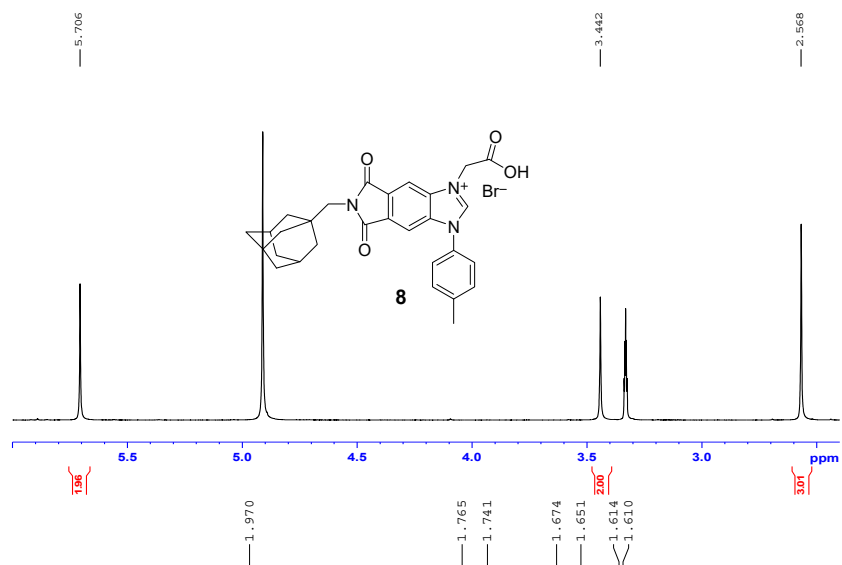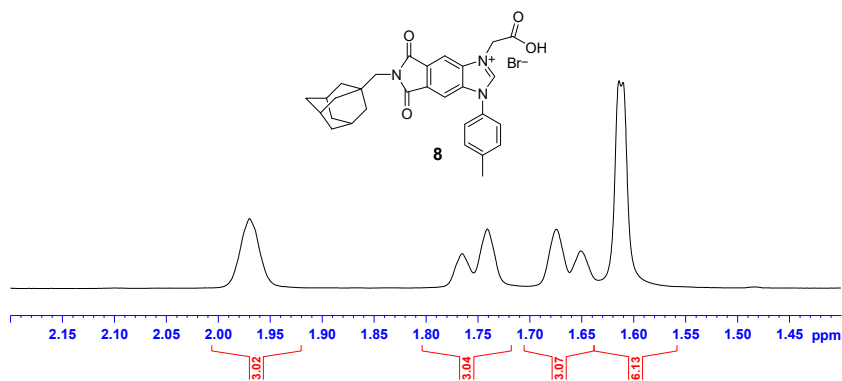

$^{13}\text{C}$ -NMR ( $\text{CD}_3\text{OD}$ ) spectrum of **8**

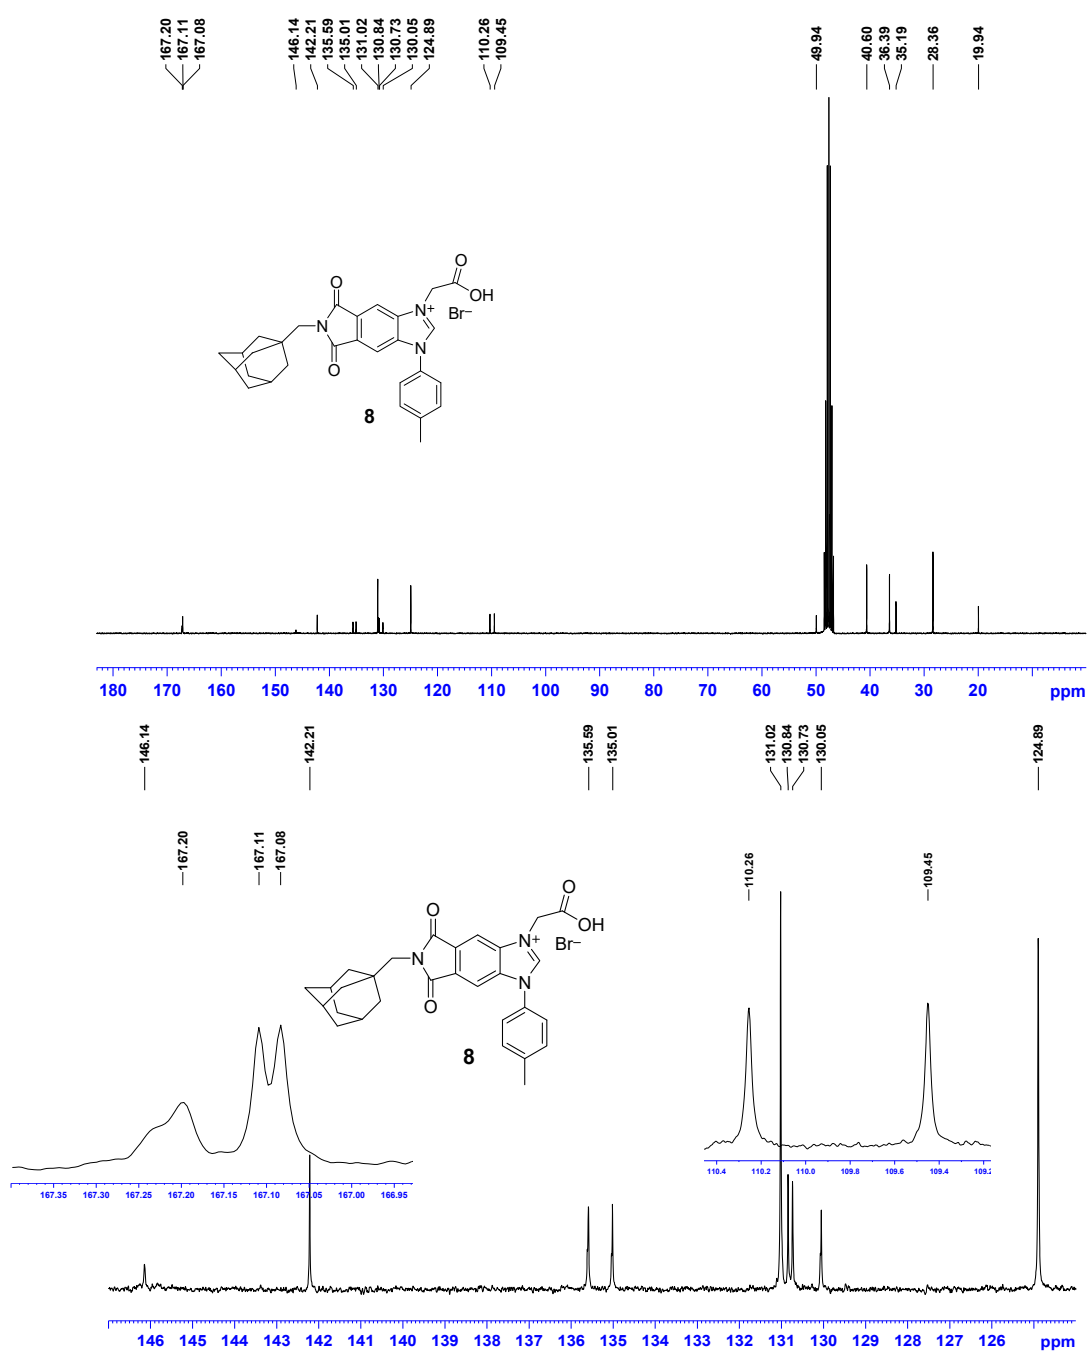

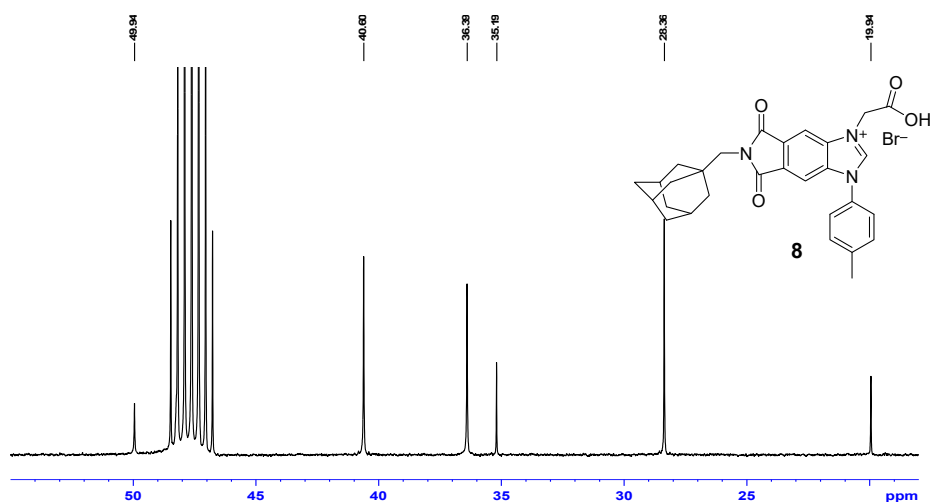

**$C_{27}H_{27}N_3O_2 \cdot \frac{1}{2} C_4H_{10}O$**

### Crystal Structure Report for D8\_2824\_HK\_BTAdme (7)

A specimen of  $C_{29}H_{32}N_3O_{2.50}$ , approximate dimensions 0.065 mm x 0.319 mm x 0.322 mm, was used for the X-ray crystallographic analysis. The X-ray intensity data were measured.

The integration of the data using a monoclinic unit cell yielded a total of 58862 reflections to a maximum  $\theta$  angle of  $25.50^\circ$  (0.83 Å resolution), of which 4472 were independent (average redundancy 13.162, completeness = 99.9%,  $R_{int} = 5.68\%$ ,  $R_{sig} = 2.10\%$ ) and 3671 (82.09%) were greater than  $2\sigma(F^2)$ . The final cell constants of  $a = 16.0391(9)$  Å,  $b = 12.5958(7)$  Å,  $c = 12.2622(6)$  Å,  $\beta = 104.282(2)^\circ$ , volume =  $2400.7(2)$  Å<sup>3</sup>, are based upon the refinement of the XYZ-centroids of reflections above  $20\sigma(I)$ . The calculated minimum and maximum transmission coefficients (based on crystal size) are 0.9305 and 1.0000.

The structure was solved and refined using the Bruker SHELXTL Software Package, using the space group P 1 21/c 1, with  $Z = 4$  for the formula unit,  $C_{29}H_{32}N_3O_{2.50}$ . The final anisotropic full-matrix least-squares refinement on  $F^2$  with 334 variables converged at  $R1 = 5.11\%$ , for the observed data and  $wR2 = 13.18\%$  for all data. The goodness-of-fit was 1.058. The largest peak in the final difference electron density synthesis was  $0.403 \text{ e}^-/\text{\AA}^3$  and the largest hole was  $-0.264 \text{ e}^-/\text{\AA}^3$  with an RMS deviation of  $0.048 \text{ e}^-/\text{\AA}^3$ . On the basis of the final model, the calculated density was  $1.280 \text{ g/cm}^3$  and  $F(000)$ , 988  $e^-$ .

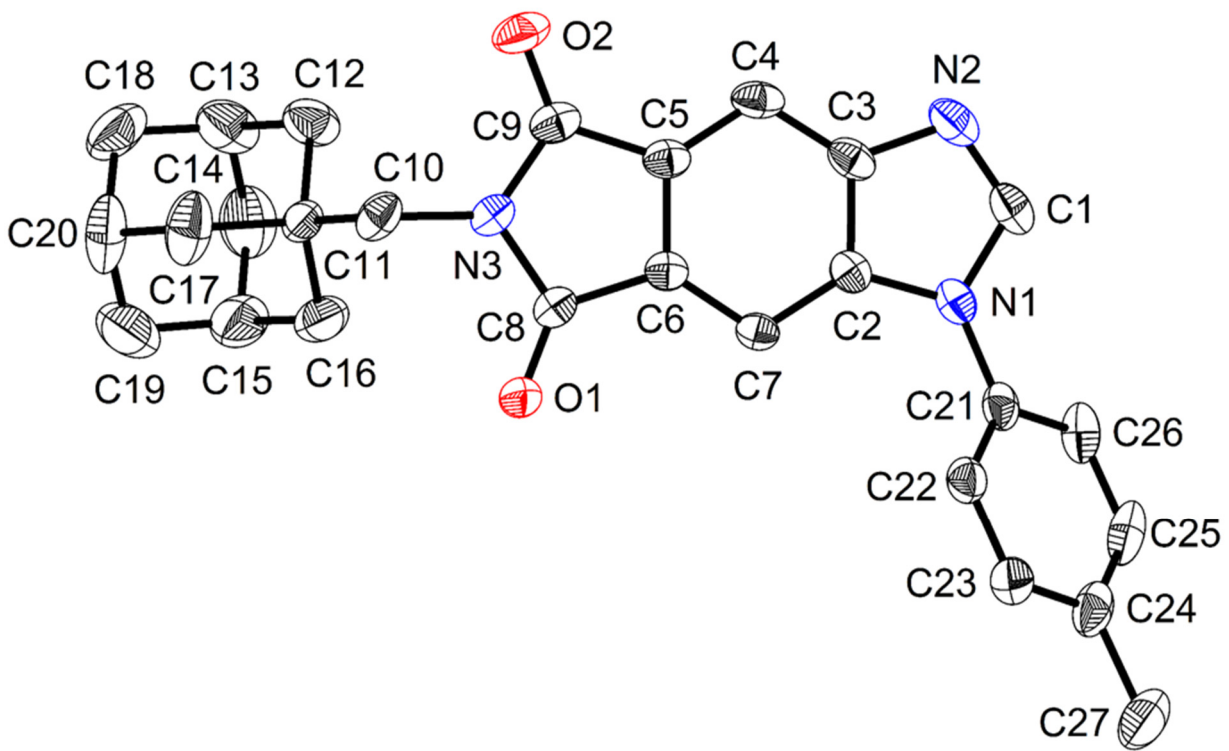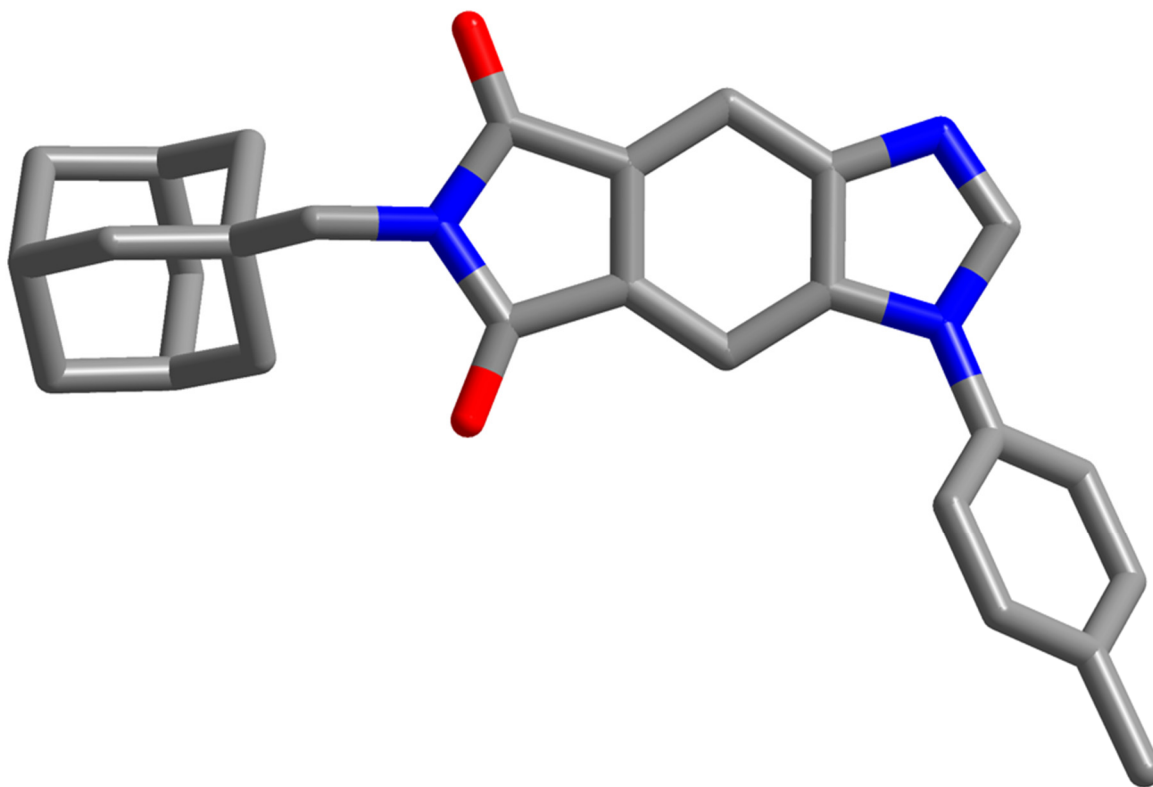

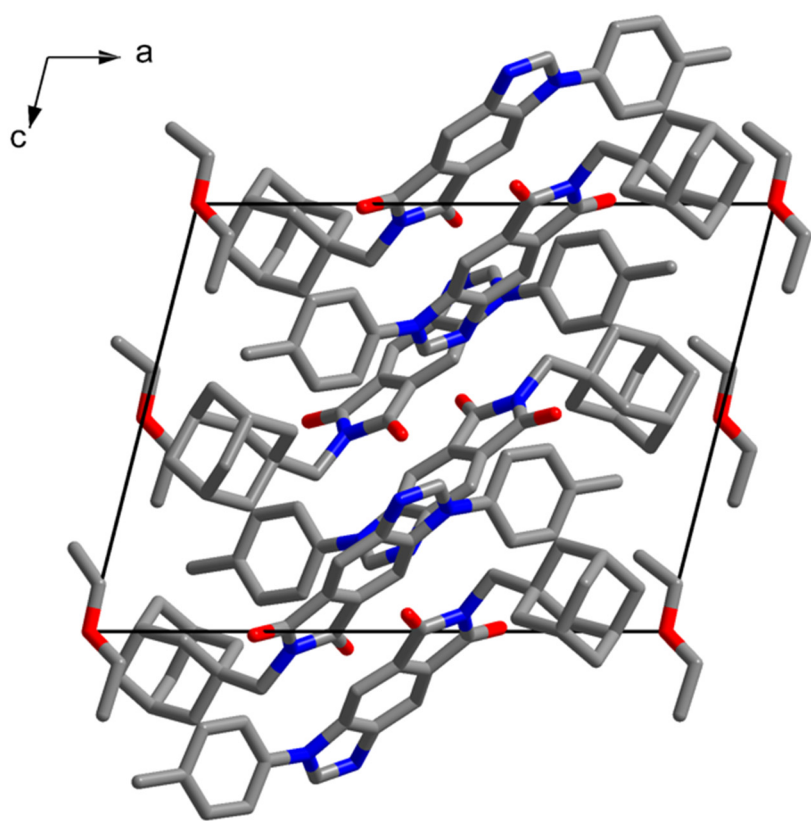

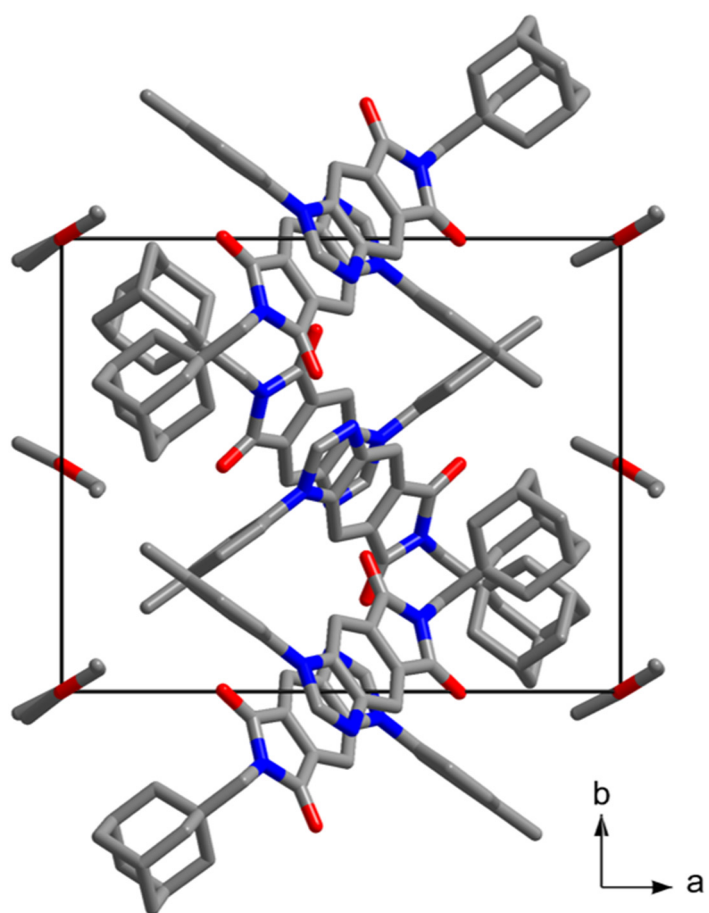

**Table S1. Sample and crystal data for D8\_2824\_HK\_BTolAd.**

|                        |                                                       |                            |
|------------------------|-------------------------------------------------------|----------------------------|
| Identification code    | D8_2824_HK_BTolAd                                     |                            |
| Chemical formula       | $\text{C}_{29}\text{H}_{32}\text{N}_3\text{O}_{2.50}$ |                            |
| Formula weight         | 462.57 g/mol                                          |                            |
| Temperature            | 140(2) K                                              |                            |
| Wavelength             | 0.71073 Å                                             |                            |
| Crystal size           | 0.065 x 0.319 x 0.322 mm                              |                            |
| Crystal system         | monoclinic                                            |                            |
| Space group            | P 1 21/c 1                                            |                            |
| Unit cell dimensions   | a = 16.0391(9) Å                                      | $\alpha = 90^\circ$        |
|                        | b = 12.5958(7) Å                                      | $\beta = 104.282(2)^\circ$ |
|                        | c = 12.2622(6) Å                                      | $\gamma = 90^\circ$        |
| Volume                 | 2400.7(2) Å <sup>3</sup>                              |                            |
| Z                      | 4                                                     |                            |
| Density (calculated)   | 1.280 g/cm <sup>3</sup>                               |                            |
| Absorption coefficient | 0.082 mm <sup>-1</sup>                                |                            |
| F(000)                 | 988                                                   |                            |

**Table S2. Data collection and structure refinement for D8\_2824\_HK\_BTolAd.**

|                                 |                                             |
|---------------------------------|---------------------------------------------|
| Theta range for data collection | 2.36 to 25.50°                              |
| Index ranges                    | -19<=h<=19, -15<=k<=15, -14<=l<=14          |
| Reflections collected           | 58862                                       |
| Independent reflections         | 4472 [R(int) = 0.0568]                      |
| Max. and min. transmission      | 1.0000 and 0.9305                           |
| Structure solution technique    | direct methods                              |
| Structure solution program      | SHELXT-2014 (Sheldrick 2014)                |
| Refinement method               | Full-matrix least-squares on F <sup>2</sup> |
| Refinement program              | SHELXL-2014 (Sheldrick 2014)                |



|                                |                                                                                             |
|--------------------------------|---------------------------------------------------------------------------------------------|
| Function minimized             | $\Sigma w(F_o^2 - F_c^2)^2$                                                                 |
| Data / restraints / parameters | 4472 / 0 / 334                                                                              |
| Goodness-of-fit on $F^2$       | 1.058                                                                                       |
| Final R indices                | 3671 data; $I > 2\sigma(I)$ R1 = 0.0511, wR2 = 0.1230<br>all data R1 = 0.0637, wR2 = 0.1318 |
| Weighting scheme               | $w = 1/[\sigma^2(F_o^2) + (0.0542P)^2 + 1.5599P]$<br>where $P = (F_o^2 + 2F_c^2)/3$         |
| Largest diff. peak and hole    | 0.403 and -0.264 eÅ <sup>-3</sup>                                                           |
| R.M.S. deviation from mean     | 0.048 eÅ <sup>-3</sup>                                                                      |

**Table S3. Atomic coordinates and equivalent isotropic atomic displacement parameters (Å<sup>2</sup>) for D8\_2824\_HK\_BTolAd.**

U(eq) is defined as one third of the trace of the orthogonalized  $U_{ij}$  tensor.

|     | x/a         | y/b         | z/c         | U(eq)     |
|-----|-------------|-------------|-------------|-----------|
| O1  | 0.54538(8)  | 0.20374(11) | 0.46052(11) | 0.0360(3) |
| O2  | 0.71146(9)  | 0.50230(11) | 0.49131(13) | 0.0440(4) |
| N1  | 0.43196(10) | 0.44201(12) | 0.78604(12) | 0.0295(3) |
| N2  | 0.51934(11) | 0.58422(13) | 0.80781(14) | 0.0405(4) |
| N3  | 0.64102(9)  | 0.34088(12) | 0.45957(12) | 0.0299(3) |
| C1  | 0.45760(13) | 0.53589(15) | 0.84042(17) | 0.0374(5) |
| C2  | 0.48333(11) | 0.42792(14) | 0.71130(14) | 0.0261(4) |
| C3  | 0.53674(12) | 0.51878(14) | 0.72533(15) | 0.0311(4) |
| C4  | 0.59725(11) | 0.53296(14) | 0.66150(16) | 0.0332(4) |
| C5  | 0.60216(11) | 0.45196(14) | 0.58833(15) | 0.0285(4) |
| C6  | 0.55065(11) | 0.36046(13) | 0.57830(14) | 0.0260(4) |
| C7  | 0.48969(11) | 0.34474(14) | 0.63858(14) | 0.0265(4) |
| C8  | 0.57473(11) | 0.28960(15) | 0.49462(14) | 0.0284(4) |
| C9  | 0.65904(11) | 0.44056(15) | 0.51035(15) | 0.0315(4) |
| C10 | 0.67671(12) | 0.30176(17) | 0.36853(15) | 0.0356(4) |

|      | x/a         | y/b         | z/c         | U(eq)      |
|------|-------------|-------------|-------------|------------|
| C11  | 0.75499(11) | 0.22918(15) | 0.40383(15) | 0.0307(4)  |
| C12  | 0.83170(13) | 0.28616(17) | 0.4790(2)   | 0.0468(5)  |
| C13  | 0.91080(14) | 0.2130(2)   | 0.5057(2)   | 0.0571(7)  |
| C14  | 0.89225(16) | 0.1178(2)   | 0.5681(2)   | 0.0629(7)  |
| C15  | 0.81784(16) | 0.05821(19) | 0.4977(2)   | 0.0597(7)  |
| C16  | 0.73750(14) | 0.12994(17) | 0.4684(2)   | 0.0495(6)  |
| C17  | 0.77902(16) | 0.1923(2)   | 0.29651(19) | 0.0603(7)  |
| C18  | 0.93354(15) | 0.1795(2)   | 0.3984(3)   | 0.0644(7)  |
| C19  | 0.83787(18) | 0.0223(2)   | 0.3883(3)   | 0.0709(8)  |
| C20  | 0.85718(17) | 0.1185(3)   | 0.3237(2)   | 0.0668(8)  |
| C21  | 0.36381(12) | 0.37586(14) | 0.80273(15) | 0.0299(4)  |
| C22  | 0.30750(12) | 0.32982(15) | 0.71127(15) | 0.0327(4)  |
| C23  | 0.24042(13) | 0.26727(16) | 0.72788(17) | 0.0383(5)  |
| C24  | 0.22711(13) | 0.25190(16) | 0.83424(18) | 0.0404(5)  |
| C25  | 0.28394(13) | 0.30027(18) | 0.92416(17) | 0.0430(5)  |
| C26  | 0.35261(13) | 0.36070(17) | 0.91024(16) | 0.0383(5)  |
| C27  | 0.15254(15) | 0.1861(2)   | 0.8512(2)   | 0.0574(7)  |
| O30  | 0.0         | 0.5         | 0.5         | 0.0600(6)  |
| C29  | 0.0033(3)   | 0.4975(4)   | 0.6110(4)   | 0.0537(12) |
| C28  | 0.0612(11)  | 0.4424(12)  | 0.6943(13)  | 0.099(5)   |
| C29B | 0.0665(3)   | 0.4506(3)   | 0.5746(4)   | 0.0465(11) |
| C28B | 0.0772(9)   | 0.4520(14)  | 0.6755(11)  | 0.108(6)   |

**Table S4. Bond lengths (Å) for D8\_2824\_HK\_BTolAd.**

|        |          |       |          |
|--------|----------|-------|----------|
| O1-C8  | 1.212(2) | O2-C9 | 1.210(2) |
| N1-C1  | 1.370(2) | N1-C2 | 1.387(2) |
| N1-C21 | 1.429(2) | N2-C1 | 1.306(3) |

|          |          |          |          |
|----------|----------|----------|----------|
| N2-C3    | 1.386(2) | N3-C8    | 1.399(2) |
| N3-C9    | 1.400(2) | N3-C10   | 1.460(2) |
| C1-H1    | 0.95     | C2-C7    | 1.396(2) |
| C2-C3    | 1.414(3) | C3-C4    | 1.400(3) |
| C4-C5    | 1.374(3) | C4-H4    | 0.95     |
| C5-C6    | 1.406(2) | C5-C9    | 1.483(3) |
| C6-C7    | 1.378(2) | C6-C8    | 1.481(2) |
| C7-H7    | 0.95     | C10-C11  | 1.527(3) |
| C10-H10A | 0.99     | C10-H10B | 0.99     |
| C11-C12  | 1.523(3) | C11-C17  | 1.532(3) |
| C11-C16  | 1.542(3) | C12-C13  | 1.537(3) |
| C12-H12A | 0.99     | C12-H12B | 0.99     |
| C13-C14  | 1.491(4) | C13-C18  | 1.510(4) |
| C13-H13  | 1.0      | C14-C15  | 1.491(4) |
| C14-H14A | 0.99     | C14-H14B | 0.99     |
| C15-C19  | 1.523(4) | C15-C16  | 1.542(3) |
| C15-H15  | 1.0      | C16-H16A | 0.99     |
| C16-H16B | 0.99     | C17-C20  | 1.530(4) |
| C17-H17A | 0.99     | C17-H17B | 0.99     |
| C18-C20  | 1.541(4) | C18-H18A | 0.99     |
| C18-H18B | 0.99     | C19-C20  | 1.521(4) |
| C19-H19A | 0.99     | C19-H19B | 0.99     |
| C20-H20  | 1.0      | C21-C22  | 1.382(3) |
| C21-C26  | 1.387(3) | C22-C23  | 1.388(3) |
| C22-H22  | 0.95     | C23-C24  | 1.386(3) |
| C23-H23  | 0.95     | C24-C25  | 1.386(3) |
| C24-C27  | 1.511(3) | C25-C26  | 1.384(3) |
| C25-H25  | 0.95     | C26-H26  | 0.95     |
| C27-H27A | 0.98     | C27-H27B | 0.98     |

|           |          |           |           |
|-----------|----------|-----------|-----------|
| C27-H27C  | 0.98     | O30-C29   | 1.349(5)  |
| O30-C29   | 1.349(5) | O30-C29B  | 1.371(5)  |
| O30-C29B  | 1.371(5) | C29-C28   | 1.387(16) |
| C29-H29A  | 0.99     | C29-H29B  | 0.99      |
| C28-H28A  | 0.98     | C28-H28B  | 0.98      |
| C28-H28C  | 0.98     | C29B-C28B | 1.206(14) |
| C29B-H29C | 0.99     | C29B-H29D | 0.99      |
| C28B-H28D | 0.98     | C28B-H28E | 0.98      |
| C28B-H28F | 0.98     |           |           |

**Table S5. Bond angles (°) for D8\_2824\_HK\_BTolAd.**

|            |            |             |            |
|------------|------------|-------------|------------|
| C1-N1-C2   | 106.03(16) | C1-N1-C21   | 125.60(16) |
| C2-N1-C21  | 128.34(15) | C1-N2-C3    | 104.52(16) |
| C8-N3-C9   | 111.51(15) | C8-N3-C10   | 123.37(15) |
| C9-N3-C10  | 124.47(15) | N2-C1-N1    | 114.37(17) |
| N2-C1-H1   | 122.8      | N1-C1-H1    | 122.8      |
| N1-C2-C7   | 131.86(16) | N1-C2-C3    | 104.89(15) |
| C7-C2-C3   | 123.20(16) | N2-C3-C4    | 128.63(17) |
| N2-C3-C2   | 110.19(17) | C4-C3-C2    | 121.18(17) |
| C5-C4-C3   | 115.44(16) | C5-C4-H4    | 122.3      |
| C3-C4-H4   | 122.3      | C4-C5-C6    | 122.62(17) |
| C4-C5-C9   | 129.55(17) | C6-C5-C9    | 107.82(15) |
| C7-C6-C5   | 123.39(16) | C7-C6-C8    | 128.75(16) |
| C5-C6-C8   | 107.86(15) | C6-C7-C2    | 114.10(16) |
| C6-C7-H7   | 122.9      | C2-C7-H7    | 122.9      |
| O1-C8-N3   | 124.46(16) | O1-C8-C6    | 129.14(16) |
| N3-C8-C6   | 106.40(15) | O2-C9-N3    | 124.61(18) |
| O2-C9-C5   | 129.05(18) | N3-C9-C5    | 106.34(14) |
| N3-C10-C11 | 115.81(15) | N3-C10-H10A | 108.3      |

|              |            |               |            |
|--------------|------------|---------------|------------|
| C11-C10-H10A | 108.3      | N3-C10-H10B   | 108.3      |
| C11-C10-H10B | 108.3      | H10A-C10-H10B | 107.4      |
| C12-C11-C10  | 111.99(16) | C12-C11-C17   | 109.03(17) |
| C10-C11-C17  | 107.55(16) | C12-C11-C16   | 107.06(17) |
| C10-C11-C16  | 112.96(15) | C17-C11-C16   | 108.16(19) |
| C11-C12-C13  | 110.34(17) | C11-C12-H12A  | 109.6      |
| C13-C12-H12A | 109.6      | C11-C12-H12B  | 109.6      |
| C13-C12-H12B | 109.6      | H12A-C12-H12B | 108.1      |
| C14-C13-C18  | 110.1(2)   | C14-C13-C12   | 109.4(2)   |
| C18-C13-C12  | 110.3(2)   | C14-C13-H13   | 109.0      |
| C18-C13-H13  | 109.0      | C12-C13-H13   | 109.0      |
| C13-C14-C15  | 109.9(2)   | C13-C14-H14A  | 109.7      |
| C15-C14-H14A | 109.7      | C13-C14-H14B  | 109.7      |
| C15-C14-H14B | 109.7      | H14A-C14-H14B | 108.2      |
| C14-C15-C19  | 110.3(2)   | C14-C15-C16   | 110.1(2)   |
| C19-C15-C16  | 108.3(2)   | C14-C15-H15   | 109.4      |
| C19-C15-H15  | 109.4      | C16-C15-H15   | 109.4      |
| C15-C16-C11  | 110.34(17) | C15-C16-H16A  | 109.6      |
| C11-C16-H16A | 109.6      | C15-C16-H16B  | 109.6      |
| C11-C16-H16B | 109.6      | H16A-C16-H16B | 108.1      |
| C20-C17-C11  | 111.28(19) | C20-C17-H17A  | 109.4      |
| C11-C17-H17A | 109.4      | C20-C17-H17B  | 109.4      |
| C11-C17-H17B | 109.4      | H17A-C17-H17B | 108.0      |
| C13-C18-C20  | 109.24(18) | C13-C18-H18A  | 109.8      |
| C20-C18-H18A | 109.8      | C13-C18-H18B  | 109.8      |
| C20-C18-H18B | 109.8      | H18A-C18-H18B | 108.3      |
| C20-C19-C15  | 109.7(2)   | C20-C19-H19A  | 109.7      |
| C15-C19-H19A | 109.7      | C20-C19-H19B  | 109.7      |
| C15-C19-H19B | 109.7      | H19A-C19-H19B | 108.2      |

|                |            |                |            |
|----------------|------------|----------------|------------|
| C19-C20-C17    | 109.7(2)   | C19-C20-C18    | 108.8(2)   |
| C17-C20-C18    | 108.3(2)   | C19-C20-H20    | 110.0      |
| C17-C20-H20    | 110.0      | C18-C20-H20    | 110.0      |
| C22-C21-C26    | 120.11(18) | C22-C21-N1     | 119.89(16) |
| C26-C21-N1     | 119.96(17) | C21-C22-C23    | 119.60(17) |
| C21-C22-H22    | 120.2      | C23-C22-H22    | 120.2      |
| C24-C23-C22    | 121.5(2)   | C24-C23-H23    | 119.3      |
| C22-C23-H23    | 119.3      | C23-C24-C25    | 117.61(19) |
| C23-C24-C27    | 121.1(2)   | C25-C24-C27    | 121.3(2)   |
| C26-C25-C24    | 122.06(18) | C26-C25-H25    | 119.0      |
| C24-C25-H25    | 119.0      | C25-C26-C21    | 119.12(19) |
| C25-C26-H26    | 120.4      | C21-C26-H26    | 120.4      |
| C24-C27-H27A   | 109.5      | C24-C27-H27B   | 109.5      |
| H27A-C27-H27B  | 109.5      | C24-C27-H27C   | 109.5      |
| H27A-C27-H27C  | 109.5      | H27B-C27-H27C  | 109.5      |
| C29-O30-C29    | 180.0(4)   | C29B-O30-C29B  | 180.0      |
| O30-C29-C28    | 127.4(7)   | O30-C29-H29A   | 105.5      |
| C28-C29-H29A   | 105.5      | O30-C29-H29B   | 105.5      |
| C28-C29-H29B   | 105.5      | H29A-C29-H29B  | 106.0      |
| C29-C28-H28A   | 109.5      | C29-C28-H28B   | 109.5      |
| H28A-C28-H28B  | 109.5      | C29-C28-H28C   | 109.5      |
| H28A-C28-H28C  | 109.5      | H28B-C28-H28C  | 109.5      |
| C28B-C29B-O30  | 124.7(8)   | C28B-C29B-H29C | 106.2      |
| O30-C29B-H29C  | 106.2      | C28B-C29B-H29D | 106.2      |
| O30-C29B-H29D  | 106.2      | H29C-C29B-H29D | 106.4      |
| C29B-C28B-H28D | 109.5      | C29B-C28B-H28E | 109.5      |
| H28D-C28B-H28E | 109.5      | C29B-C28B-H28F | 109.5      |
| H28D-C28B-H28F | 109.5      | H28E-C28B-H28F | 109.5      |

**Table S6. Anisotropic atomic displacement parameters ( $\text{\AA}^2$ ) for D8\_2824\_HK\_BTolAd.**

The anisotropic atomic displacement factor exponent takes the form:  $-2\pi^2 [h^2 a^{*2} U_{11} + \dots + 2 h k a^* b^* U_{12}]$

|     | <b>U<sub>11</sub></b> | <b>U<sub>22</sub></b> | <b>U<sub>33</sub></b> | <b>U<sub>23</sub></b> | <b>U<sub>13</sub></b> | <b>U<sub>12</sub></b> |
|-----|-----------------------|-----------------------|-----------------------|-----------------------|-----------------------|-----------------------|
| O1  | 0.0340(7)             | 0.0376(8)             | 0.0396(7)             | -0.0112(6)            | 0.0156(6)             | -0.0112(6)            |
| O2  | 0.0383(8)             | 0.0346(8)             | 0.0620(10)            | 0.0132(7)             | 0.0180(7)             | -0.0071(6)            |
| N1  | 0.0344(8)             | 0.0253(8)             | 0.0282(8)             | -0.0015(6)            | 0.0066(6)             | 0.0052(6)             |
| N2  | 0.0418(9)             | 0.0283(9)             | 0.0480(10)            | -0.0102(7)            | 0.0046(8)             | 0.0028(7)             |
| N3  | 0.0263(7)             | 0.0336(8)             | 0.0310(8)             | 0.0040(7)             | 0.0095(6)             | -0.0030(6)            |
| C1  | 0.0409(11)            | 0.0311(10)            | 0.0381(10)            | -0.0088(8)            | 0.0058(8)             | 0.0078(9)             |
| C2  | 0.0290(9)             | 0.0226(9)             | 0.0254(8)             | 0.0033(7)             | 0.0038(7)             | 0.0051(7)             |
| C3  | 0.0332(9)             | 0.0208(9)             | 0.0352(10)            | -0.0003(7)            | 0.0007(8)             | 0.0045(7)             |
| C4  | 0.0293(9)             | 0.0212(9)             | 0.0450(11)            | 0.0049(8)             | 0.0014(8)             | -0.0017(7)            |
| C5  | 0.0272(9)             | 0.0232(9)             | 0.0329(9)             | 0.0070(7)             | 0.0032(7)             | 0.0003(7)             |
| C6  | 0.0264(9)             | 0.0242(9)             | 0.0260(8)             | 0.0035(7)             | 0.0036(7)             | 0.0005(7)             |
| C7  | 0.0295(9)             | 0.0210(8)             | 0.0281(9)             | 0.0019(7)             | 0.0057(7)             | -0.0012(7)            |
| C8  | 0.0245(8)             | 0.0327(10)            | 0.0280(9)             | 0.0031(8)             | 0.0065(7)             | -0.0022(7)            |
| C9  | 0.0258(9)             | 0.0295(10)            | 0.0369(10)            | 0.0113(8)             | 0.0037(7)             | 0.0002(8)             |
| C10 | 0.0305(9)             | 0.0503(12)            | 0.0272(9)             | 0.0033(8)             | 0.0096(7)             | -0.0045(9)            |
| C11 | 0.0270(9)             | 0.0379(11)            | 0.0292(9)             | -0.0034(8)            | 0.0104(7)             | -0.0060(8)            |
| C12 | 0.0335(11)            | 0.0387(12)            | 0.0622(14)            | -0.0100(10)           | 0.0006(9)             | -0.0020(9)            |
| C13 | 0.0328(11)            | 0.0497(14)            | 0.0792(17)            | -0.0156(13)           | -0.0048(11)           | 0.0013(10)            |
| C14 | 0.0549(15)            | 0.0677(17)            | 0.0643(16)            | 0.0046(13)            | 0.0110(12)            | 0.0237(13)            |
| C15 | 0.0594(15)            | 0.0357(12)            | 0.093(2)              | 0.0141(13)            | 0.0361(14)            | 0.0048(11)            |
| C16 | 0.0422(12)            | 0.0398(12)            | 0.0722(16)            | 0.0048(11)            | 0.0251(11)            | -0.0049(10)           |
| C17 | 0.0524(14)            | 0.094(2)              | 0.0373(12)            | -0.0062(13)           | 0.0170(10)            | 0.0113(14)            |
| C18 | 0.0365(12)            | 0.0595(16)            | 0.106(2)              | 0.0144(15)            | 0.0341(13)            | 0.0034(11)            |
| C19 | 0.0548(15)            | 0.0474(15)            | 0.107(2)              | -0.0268(15)           | 0.0132(15)            | -0.0022(12)           |
| C20 | 0.0550(15)            | 0.101(2)              | 0.0510(14)            | -0.0143(14)           | 0.0247(12)            | 0.0208(15)            |

|      | <b>U<sub>11</sub></b> | <b>U<sub>22</sub></b> | <b>U<sub>33</sub></b> | <b>U<sub>23</sub></b> | <b>U<sub>13</sub></b> | <b>U<sub>12</sub></b> |
|------|-----------------------|-----------------------|-----------------------|-----------------------|-----------------------|-----------------------|
| C21  | 0.0346(10)            | 0.0256(9)             | 0.0323(9)             | 0.0028(8)             | 0.0135(8)             | 0.0105(8)             |
| C22  | 0.0410(10)            | 0.0306(10)            | 0.0299(9)             | -0.0005(8)            | 0.0150(8)             | 0.0016(8)             |
| C23  | 0.0411(11)            | 0.0338(11)            | 0.0441(11)            | -0.0022(9)            | 0.0183(9)             | 0.0007(9)             |
| C24  | 0.0401(11)            | 0.0365(11)            | 0.0521(12)            | 0.0118(9)             | 0.0258(10)            | 0.0148(9)             |
| C25  | 0.0447(12)            | 0.0540(13)            | 0.0382(11)            | 0.0158(10)            | 0.0251(9)             | 0.0228(10)            |
| C26  | 0.0393(11)            | 0.0473(12)            | 0.0295(10)            | 0.0012(9)             | 0.0109(8)             | 0.0170(9)             |
| C27  | 0.0520(14)            | 0.0553(15)            | 0.0774(17)            | 0.0173(13)            | 0.0394(13)            | 0.0085(11)            |
| O30  | 0.0479(13)            | 0.0718(17)            | 0.0630(16)            | 0.0057(13)            | 0.0190(11)            | 0.0097(12)            |
| C29  | 0.058(3)              | 0.045(3)              | 0.056(3)              | -0.007(2)             | 0.011(2)              | 0.004(2)              |
| C28  | 0.140(9)              | 0.084(8)              | 0.085(8)              | -0.018(7)             | 0.053(7)              | -0.039(6)             |
| C29B | 0.046(2)              | 0.032(2)              | 0.067(3)              | 0.005(2)              | 0.025(2)              | 0.0021(19)            |
| C28B | 0.103(8)              | 0.124(9)              | 0.069(6)              | 0.061(6)              | -0.031(6)             | -0.034(7)             |

**Table S7. Hydrogen atomic coordinates and isotropic atomic displacement parameters ( $\text{\AA}^2$ ) for D8\_2824\_HK\_BTolAd.**

|      | <b>x/a</b> | <b>y/b</b> | <b>z/c</b> | <b>U(eq)</b> |
|------|------------|------------|------------|--------------|
| H1   | 0.4326     | 0.5635     | 0.8971     | 0.045        |
| H4   | 0.6325     | 0.5944     | 0.6683     | 0.04         |
| H7   | 0.4550     | 0.2827     | 0.6313     | 0.032        |
| H10A | 0.6929     | 0.3637     | 0.3284     | 0.043        |
| H10B | 0.6310     | 0.2628     | 0.3144     | 0.043        |
| H12A | 0.8175     | 0.3078     | 0.5499     | 0.056        |
| H12B | 0.8448     | 0.3510     | 0.4407     | 0.056        |
| H13  | 0.9606     | 0.2523     | 0.5540     | 0.069        |
| H14A | 0.8789     | 0.1403     | 0.6393     | 0.076        |
| H14B | 0.9435     | 0.0712     | 0.5869     | 0.076        |
| H15  | 0.8057     | -0.0053    | 0.5403     | 0.072        |
| H16A | 0.7220     | 0.1519     | 0.5384     | 0.059        |



|      | <b>x/a</b> | <b>y/b</b> | <b>z/c</b> | <b>U(eq)</b> |
|------|------------|------------|------------|--------------|
| H16B | 0.6885     | 0.0898     | 0.4216     | 0.059        |
| H17A | 0.7295     | 0.1546     | 0.2476     | 0.072        |
| H17B | 0.7920     | 0.2550     | 0.2548     | 0.072        |
| H18A | 0.9852     | 0.1336     | 0.4163     | 0.077        |
| H18B | 0.9466     | 0.2429     | 0.3578     | 0.077        |
| H19A | 0.8881     | -0.0260    | 0.4051     | 0.085        |
| H19B | 0.7881     | -0.0169    | 0.3420     | 0.085        |
| H20  | 0.8717     | 0.0953     | 0.2526     | 0.08         |
| H22  | 0.3146     | 0.3409     | 0.6375     | 0.039        |
| H23  | 0.2028     | 0.2343     | 0.6650     | 0.046        |
| H25  | 0.2755     | 0.2916     | 0.9976     | 0.052        |
| H26  | 0.3916     | 0.3914     | 0.9735     | 0.046        |
| H27A | 0.1740     | 0.1178     | 0.8850     | 0.086        |
| H27B | 0.1118     | 0.1739     | 0.7784     | 0.086        |
| H27C | 0.1235     | 0.2239     | 0.9012     | 0.086        |
| H29A | -0.0544    | 0.4734     | 0.6161     | 0.064        |
| H29B | 0.0080     | 0.5726     | 0.6356     | 0.064        |
| H28A | 0.0774     | 0.3760     | 0.6631     | 0.148        |
| H28B | 0.0346     | 0.4262     | 0.7562     | 0.148        |
| H28C | 0.1127     | 0.4858     | 0.7224     | 0.148        |
| H29C | 0.0634     | 0.3748     | 0.5526     | 0.056        |
| H29D | 0.1200     | 0.4789     | 0.5593     | 0.056        |
| H28D | 0.0561     | 0.5194     | 0.6983     | 0.162        |
| H28E | 0.1387     | 0.4446     | 0.7114     | 0.162        |
| H28F | 0.0456     | 0.3931     | 0.6987     | 0.162        |

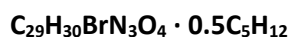

### Crystal Structure Report for D8\_2953\_HK\_BTolBr (8)

A specimen of C<sub>31.50</sub>H<sub>36</sub>BrN<sub>3</sub>O<sub>4</sub>, approximate dimensions 0.051 mm x 0.202 mm x 0.265 mm, was used for the X-ray crystallographic analysis. The X-ray intensity data were measured.

The integration of the data using an orthorhombic unit cell yielded a total of 38548 reflections to a maximum  $\theta$  angle of 25.50° (0.83 Å resolution), of which 5780 were independent (average redundancy 6.669, completeness = 99.6%,  $R_{\text{int}} = 8.39\%$ ,  $R_{\text{sig}} = 5.16\%$ ) and 4770 (82.53%) were greater than  $2\sigma(F^2)$ . The final cell constants of  $a = 12.5299(12)$  Å,  $b = 49.749(5)$  Å,  $c = 10.0582(9)$  Å, volume = 6269.8(10) Å<sup>3</sup>, are based upon the refinement of the XYZ-centroids of reflections above  $20\sigma(I)$ . The calculated minimum and maximum transmission coefficients (based on crystal size) are 0.7241 and 1.0000.

The structure was solved and refined using the Bruker SHELXTL Software Package, using the space group  $I b a 2$ , with  $Z = 8$  for the formula unit, C<sub>31.50</sub>H<sub>36</sub>BrN<sub>3</sub>O<sub>4</sub>. The final anisotropic full-matrix least-squares refinement on  $F^2$  with 357 variables converged at  $R1 = 6.48\%$ , for the observed data and  $wR2 = 17.40\%$  for all data. The goodness-of-fit was 1.104. The largest peak in the final difference electron density synthesis was 0.825 e<sup>-</sup>/Å<sup>3</sup> and the largest hole was -0.594 e<sup>-</sup>/Å<sup>3</sup> with an RMS deviation of 0.103 e<sup>-</sup>/Å<sup>3</sup>. On the basis of the final model, the calculated density was 1.272 g/cm<sup>3</sup> and  $F(000)$ , 2504 e<sup>-</sup>.

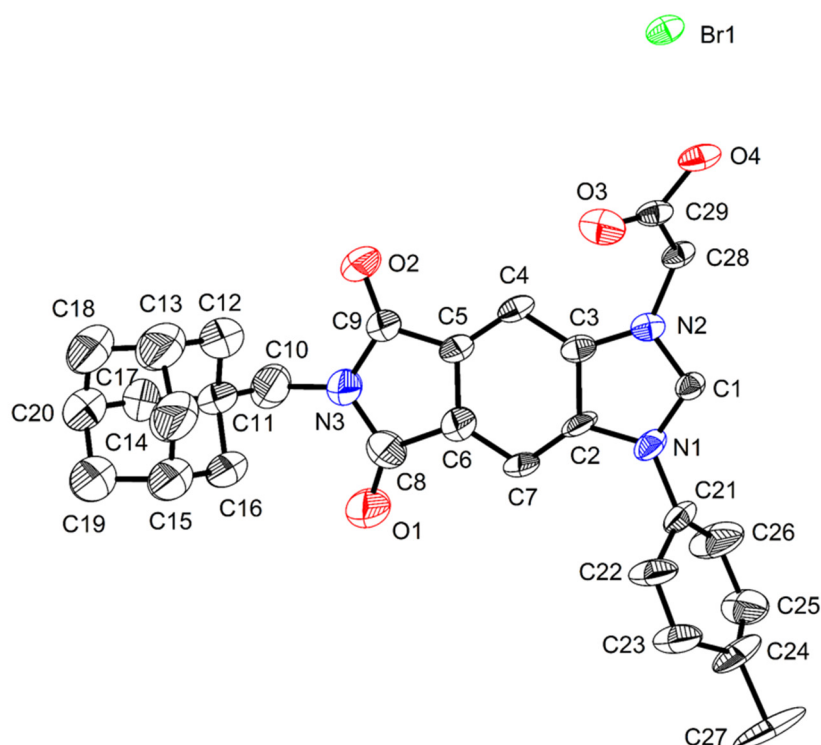

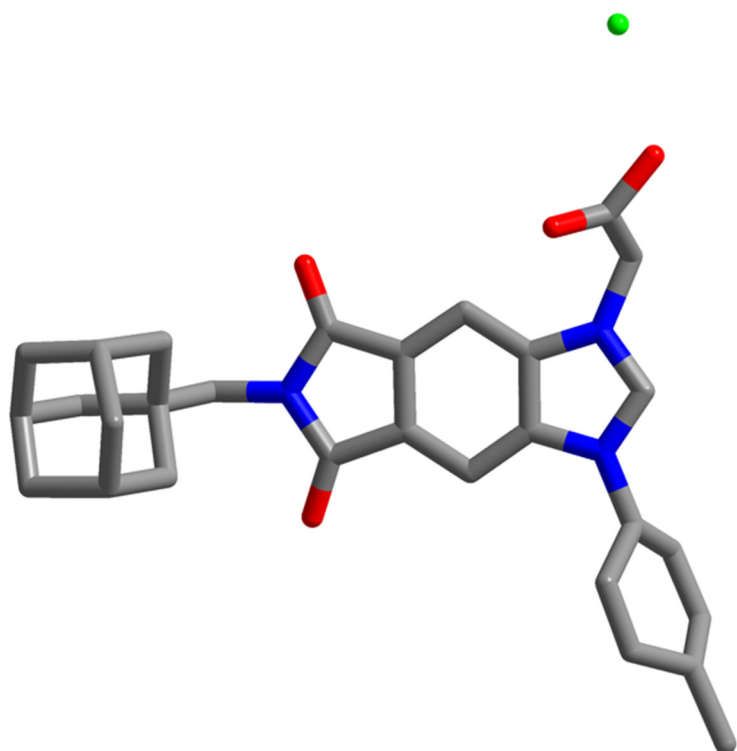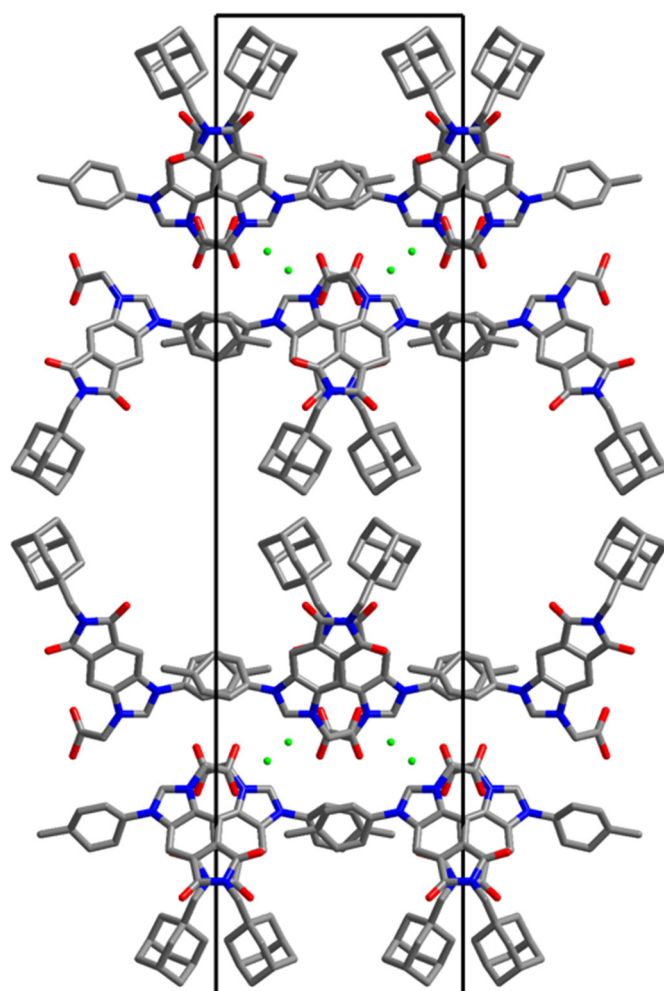

**Table S8. Sample and crystal data for D8\_2953\_HK\_BTolBr.**

|                        |                                                       |                     |
|------------------------|-------------------------------------------------------|---------------------|
| Identification code    | D8_2953_HK_BTolBr                                     |                     |
| Chemical formula       | $\text{C}_{31.50}\text{H}_{36}\text{BrN}_3\text{O}_4$ |                     |
| Formula weight         | 600.54 g/mol                                          |                     |
| Temperature            | 173(2) K                                              |                     |
| Wavelength             | 0.71073 Å                                             |                     |
| Crystal size           | 0.051 x 0.202 x 0.265 mm                              |                     |
| Crystal system         | orthorhombic                                          |                     |
| Space group            | I b a 2                                               |                     |
| Unit cell dimensions   | a = 12.5299(12) Å                                     | $\alpha = 90^\circ$ |
|                        | b = 49.749(5) Å                                       | $\beta = 90^\circ$  |
|                        | c = 10.0582(9) Å                                      | $\gamma = 90^\circ$ |
| Volume                 | 6269.8(10) Å <sup>3</sup>                             |                     |
| Z                      | 8                                                     |                     |
| Density (calculated)   | 1.272 g/cm <sup>3</sup>                               |                     |
| Absorption coefficient | 1.349 mm <sup>-1</sup>                                |                     |
| F(000)                 | 2504                                                  |                     |

**Table S9. Data collection and structure refinement for D8\_2953\_HK\_BTolBr.**

|                                 |                                             |
|---------------------------------|---------------------------------------------|
| Theta range for data collection | 2.46 to 25.50°                              |
| Index ranges                    | -15 ≤ h ≤ 14, -60 ≤ k ≤ 60, -12 ≤ l ≤ 12    |
| Reflections collected           | 38548                                       |
| Independent reflections         | 5780 [R(int) = 0.0839]                      |
| Max. and min. transmission      | 1.0000 and 0.7241                           |
| Structure solution technique    | direct methods                              |
| Structure solution program      | SHELXT-2014 (Sheldrick 2014)                |
| Refinement method               | Full-matrix least-squares on F <sup>2</sup> |
| Refinement program              | SHELXL-2014 (Sheldrick 2014)                |

|                                            |                                                                                      |
|--------------------------------------------|--------------------------------------------------------------------------------------|
| <b>Function minimized</b>                  | $\Sigma w(F_o^2 - F_c^2)^2$                                                          |
| <b>Data / restraints / parameters</b>      | 5780 / 85 / 357                                                                      |
| <b>Goodness-of-fit on <math>F^2</math></b> | 1.104                                                                                |
| <b><math>\Delta/\sigma_{\max}</math></b>   | 0.001                                                                                |
| <b>Final R indices</b>                     | 4770 data; $I > 2\sigma(I)$ R1 = 0.0648, wR2 = 0.1614                                |
|                                            | all data R1 = 0.0790, wR2 = 0.1740                                                   |
| <b>Weighting scheme</b>                    | $w = 1/[\sigma^2(F_o^2) + (0.0760P)^2 + 30.9620P]$<br>where $P = (F_o^2 + 2F_c^2)/3$ |
| <b>Absolute structure parameter</b>        | 0.1(0)                                                                               |
| <b>Extinction coefficient</b>              | 0.0030(5)                                                                            |
| <b>Largest diff. peak and hole</b>         | 0.825 and -0.594 eÅ <sup>-3</sup>                                                    |
| <b>R.M.S. deviation from mean</b>          | 0.103 eÅ <sup>-3</sup>                                                               |

**Table S10. Atomic coordinates and equivalent isotropic atomic displacement parameters (Å<sup>2</sup>) for D8\_2953\_HK\_BTolBr.**

U(eq) is defined as one third of the trace of the orthogonalized  $U_{ij}$  tensor.

|     | <b>x/a</b> | <b>y/b</b>  | <b>z/c</b>  | <b>U(eq)</b> |
|-----|------------|-------------|-------------|--------------|
| Br1 | 0.79258(5) | 0.75963(2)  | 0.02132(15) | 0.0368(3)    |
| O1  | 0.3630(8)  | 0.6013(2)   | 0.6900(18)  | 0.126(6)     |
| O2  | 0.6791(6)  | 0.64733(17) | 0.6389(9)   | 0.065(2)     |
| O3  | 0.5771(6)  | 0.70831(16) | 0.2019(8)   | 0.055(2)     |
| O4  | 0.5797(5)  | 0.75415(14) | 0.1838(6)   | 0.0428(15)   |
| N1  | 0.2400(5)  | 0.68841(16) | 0.3679(8)   | 0.0391(17)   |
| N2  | 0.3899(6)  | 0.71179(15) | 0.3555(7)   | 0.0309(17)   |
| N3  | 0.5363(8)  | 0.6179(2)   | 0.6719(15)  | 0.086(4)     |
| C1  | 0.2836(6)  | 0.71171(17) | 0.3284(8)   | 0.0314(17)   |
| C2  | 0.3187(6)  | 0.6732(2)   | 0.4316(10)  | 0.042(2)     |
| C3  | 0.4150(7)  | 0.68812(17) | 0.4190(9)   | 0.0348(19)   |
| C4  | 0.5110(6)  | 0.67932(18) | 0.4756(8)   | 0.036(2)     |

|      | <b>x/a</b> | <b>y/b</b>  | <b>z/c</b> | <b>U(eq)</b> |
|------|------------|-------------|------------|--------------|
| C5   | 0.5044(7)  | 0.65528(18) | 0.5421(15) | 0.050(3)     |
| C6   | 0.4068(8)  | 0.6409(2)   | 0.5580(15) | 0.073(5)     |
| C7   | 0.3098(7)  | 0.6495(2)   | 0.4978(18) | 0.070(5)     |
| C8   | 0.4264(11) | 0.6168(3)   | 0.6419(19) | 0.094(5)     |
| C9   | 0.5855(8)  | 0.6407(2)   | 0.6195(13) | 0.057(3)     |
| C10  | 0.5882(12) | 0.5995(4)   | 0.768(2)   | 0.108(7)     |
| C11  | 0.6322(11) | 0.5746(3)   | 0.691(3)   | 0.123(8)     |
| C12  | 0.7190(11) | 0.5819(3)   | 0.582(2)   | 0.107(7)     |
| C13  | 0.7688(13) | 0.5572(3)   | 0.539(5)   | 0.169(6)     |
| C14  | 0.6831(15) | 0.5418(4)   | 0.455(4)   | 0.173(7)     |
| C15  | 0.5950(13) | 0.5330(3)   | 0.548(4)   | 0.167(6)     |
| C16  | 0.5471(11) | 0.5579(3)   | 0.615(3)   | 0.154(7)     |
| C17  | 0.6823(14) | 0.5549(4)   | 0.789(4)   | 0.168(7)     |
| C18  | 0.8145(15) | 0.5388(4)   | 0.628(4)   | 0.174(7)     |
| C19  | 0.6459(15) | 0.5146(4)   | 0.665(4)   | 0.179(7)     |
| C20  | 0.7304(15) | 0.5303(4)   | 0.726(4)   | 0.172(6)     |
| C21  | 0.1259(6)  | 0.6824(2)   | 0.3579(9)  | 0.040(2)     |
| C22  | 0.0914(19) | 0.6743(7)   | 0.253(3)   | 0.060(5)     |
| C23  | 0.9783(16) | 0.6709(5)   | 0.238(3)   | 0.059(5)     |
| C22B | 0.0920(16) | 0.6575(6)   | 0.287(3)   | 0.061(5)     |
| C23B | 0.9886(19) | 0.6514(5)   | 0.285(3)   | 0.063(5)     |
| C24  | 0.9099(8)  | 0.6711(3)   | 0.3375(13) | 0.067(4)     |
| C25  | 0.9476(9)  | 0.6890(2)   | 0.4226(18) | 0.079(5)     |
| C26  | 0.0536(9)  | 0.6944(3)   | 0.4342(18) | 0.087(5)     |
| C27  | 0.7904(8)  | 0.6656(5)   | 0.3281(19) | 0.120(8)     |
| C28  | 0.4556(8)  | 0.7357(2)   | 0.3324(10) | 0.032(2)     |
| C29  | 0.5435(8)  | 0.7304(2)   | 0.2313(10) | 0.036(2)     |

**Table S11. Bond lengths (Å) for D8\_2953\_HK\_BTolBr.**

|          |           |          |           |
|----------|-----------|----------|-----------|
| O1-C8    | 1.208(15) | O2-C9    | 1.234(12) |
| O3-C29   | 1.212(13) | O4-C29   | 1.355(12) |
| O4-H4    | 0.84      | N1-C1    | 1.341(11) |
| N1-C2    | 1.397(12) | N1-C21   | 1.464(11) |
| N2-C1    | 1.359(11) | N2-C3    | 1.376(12) |
| N2-C28   | 1.467(12) | N3-C9    | 1.395(14) |
| N3-C8    | 1.411(17) | N3-C10   | 1.479(18) |
| C1-H1    | 0.95      | C2-C7    | 1.361(15) |
| C2-C3    | 1.422(12) | C3-C4    | 1.402(12) |
| C4-C5    | 1.373(14) | C4-H4A   | 0.95      |
| C5-C6    | 1.426(13) | C5-C9    | 1.472(15) |
| C6-C7    | 1.422(16) | C6-C8    | 1.489(17) |
| C7-H7    | 0.95      | C10-C11  | 1.56(3)   |
| C10-H10A | 0.99      | C10-H10B | 0.99      |
| C11-C17  | 1.52(3)   | C11-C16  | 1.55(3)   |
| C11-C12  | 1.59(3)   | C12-C13  | 1.45(3)   |
| C12-H12A | 0.99      | C12-H12B | 0.99      |
| C13-C18  | 1.40(4)   | C13-C14  | 1.57(4)   |
| C13-H13  | 1.0       | C14-C15  | 1.51(4)   |
| C14-H14A | 0.99      | C14-H14B | 0.99      |
| C15-C16  | 1.53(3)   | C15-C19  | 1.62(4)   |
| C15-H15  | 1.0       | C16-H16A | 0.99      |
| C16-H16B | 0.99      | C17-C20  | 1.50(4)   |
| C17-H17A | 0.99      | C17-H17B | 0.99      |
| C18-C20  | 1.51(4)   | C18-H18A | 0.99      |
| C18-H18B | 0.99      | C19-C20  | 1.45(3)   |
| C19-H19A | 0.99      | C19-H19B | 0.99      |
| C20-H20  | 1.0       | C21-C22  | 1.21(3)   |

|           |           |           |           |
|-----------|-----------|-----------|-----------|
| C21-C26   | 1.330(15) | C21-C22B  | 1.49(3)   |
| C22-C23   | 1.43(3)   | C22-H22   | 0.95      |
| C23-C24   | 1.32(3)   | C23-H23   | 0.95      |
| C22B-C23B | 1.33(3)   | C22B-H22B | 0.95      |
| C23B-C24  | 1.49(3)   | C23B-H23B | 0.95      |
| C24-C25   | 1.321(19) | C24-C27   | 1.525(14) |
| C25-C26   | 1.361(16) | C25-H25   | 0.95      |
| C26-H26   | 0.95      | C27-H27A  | 0.98      |
| C27-H27B  | 0.98      | C27-H27C  | 0.98      |
| C28-C29   | 1.522(12) | C28-H28A  | 0.99      |
| C28-H28B  | 0.99      |           |           |

**Table S12. Bond angles (°) for D8\_2953\_HK\_BTolBr.**

|           |           |           |           |
|-----------|-----------|-----------|-----------|
| C29-O4-H4 | 109.5     | C1-N1-C2  | 108.4(7)  |
| C1-N1-C21 | 123.7(7)  | C2-N1-C21 | 127.5(7)  |
| C1-N2-C3  | 108.3(7)  | C1-N2-C28 | 121.4(8)  |
| C3-N2-C28 | 129.8(8)  | C9-N3-C8  | 112.5(9)  |
| C9-N3-C10 | 123.7(11) | C8-N3-C10 | 123.0(11) |
| N1-C1-N2  | 110.0(7)  | N1-C1-H1  | 125.0     |
| N2-C1-H1  | 125.0     | C7-C2-N1  | 129.5(8)  |
| C7-C2-C3  | 124.4(9)  | N1-C2-C3  | 106.0(8)  |
| N2-C3-C4  | 130.7(8)  | N2-C3-C2  | 107.0(8)  |
| C4-C3-C2  | 122.0(8)  | C5-C4-C3  | 114.7(8)  |
| C5-C4-H4A | 122.6     | C3-C4-H4A | 122.6     |
| C4-C5-C6  | 122.8(9)  | C4-C5-C9  | 130.2(8)  |
| C6-C5-C9  | 106.7(9)  | C7-C6-C5  | 122.4(10) |
| C7-C6-C8  | 128.6(10) | C5-C6-C8  | 109.0(10) |
| C2-C7-C6  | 113.5(8)  | C2-C7-H7  | 123.3     |
| C6-C7-H7  | 123.3     | O1-C8-N3  | 125.5(13) |



|               |           |              |           |
|---------------|-----------|--------------|-----------|
| O1-C8-C6      | 129.3(13) | N3-C8-C6     | 104.6(10) |
| O2-C9-N3      | 125.4(10) | O2-C9-C5     | 127.4(10) |
| N3-C9-C5      | 107.2(8)  | N3-C10-C11   | 108.9(17) |
| N3-C10-H10A   | 109.9     | C11-C10-H10A | 109.9     |
| N3-C10-H10B   | 109.9     | C11-C10-H10B | 109.9     |
| H10A-C10-H10B | 108.3     | C17-C11-C16  | 104.9(14) |
| C17-C11-C10   | 110.(2)   | C16-C11-C10  | 115.2(14) |
| C17-C11-C12   | 108.1(15) | C16-C11-C12  | 105.(2)   |
| C10-C11-C12   | 113.5(12) | C13-C12-C11  | 107.8(18) |
| C13-C12-H12A  | 110.1     | C11-C12-H12A | 110.1     |
| C13-C12-H12B  | 110.1     | C11-C12-H12B | 110.1     |
| H12A-C12-H12B | 108.5     | C18-C13-C12  | 123.(4)   |
| C18-C13-C14   | 107.5(17) | C12-C13-C14  | 106.4(14) |
| C18-C13-H13   | 106.3     | C12-C13-H13  | 106.3     |
| C14-C13-H13   | 106.3     | C15-C14-C13  | 108.(3)   |
| C15-C14-H14A  | 110.1     | C13-C14-H14A | 110.1     |
| C15-C14-H14B  | 110.1     | C13-C14-H14B | 110.1     |
| H14A-C14-H14B | 108.4     | C14-C15-C16  | 108.9(15) |
| C14-C15-C19   | 108.9(16) | C16-C15-C19  | 107.(3)   |
| C14-C15-H15   | 110.8     | C16-C15-H15  | 110.8     |
| C19-C15-H15   | 110.8     | C15-C16-C11  | 112.4(14) |
| C15-C16-H16A  | 109.1     | C11-C16-H16A | 109.1     |
| C15-C16-H16B  | 109.1     | C11-C16-H16B | 109.1     |
| H16A-C16-H16B | 107.9     | C20-C17-C11  | 115.(3)   |
| C20-C17-H17A  | 108.6     | C11-C17-H17A | 108.6     |
| C20-C17-H17B  | 108.6     | C11-C17-H17B | 108.6     |
| H17A-C17-H17B | 107.5     | C13-C18-C20  | 108.3(19) |
| C13-C18-H18A  | 110.0     | C20-C18-H18A | 110.0     |
| C13-C18-H18B  | 110.0     | C20-C18-H18B | 110.0     |

|                |           |                |           |
|----------------|-----------|----------------|-----------|
| H18A-C18-H18B  | 108.4     | C20-C19-C15    | 107.0(17) |
| C20-C19-H19A   | 110.3     | C15-C19-H19A   | 110.3     |
| C20-C19-H19B   | 110.3     | C15-C19-H19B   | 110.3     |
| H19A-C19-H19B  | 108.6     | C19-C20-C17    | 108.7(17) |
| C19-C20-C18    | 113.(3)   | C17-C20-C18    | 109.2(17) |
| C19-C20-H20    | 108.8     | C17-C20-H20    | 108.8     |
| C18-C20-H20    | 108.8     | C22-C21-C26    | 114.1(15) |
| C22-C21-N1     | 118.5(14) | C26-C21-N1     | 122.2(10) |
| C26-C21-C22B   | 117.1(11) | N1-C21-C22B    | 118.8(10) |
| C21-C22-C23    | 119.(2)   | C21-C22-H22    | 120.5     |
| C23-C22-H22    | 120.5     | C24-C23-C22    | 124.(2)   |
| C24-C23-H23    | 117.9     | C22-C23-H23    | 117.9     |
| C23B-C22B-C21  | 118.4(19) | C23B-C22B-H22B | 120.8     |
| C21-C22B-H22B  | 120.8     | C22B-C23B-C24  | 119.(2)   |
| C22B-C23B-H23B | 120.4     | C24-C23B-H23B  | 120.4     |
| C23-C24-C25    | 105.4(15) | C25-C24-C23B   | 116.0(14) |
| C23-C24-C27    | 126.1(16) | C25-C24-C27    | 120.7(13) |
| C23B-C24-C27   | 120.7(16) | C24-C25-C26    | 122.5(12) |
| C24-C25-H25    | 118.8     | C26-C25-H25    | 118.7     |
| C21-C26-C25    | 121.8(13) | C21-C26-H26    | 119.1     |
| C25-C26-H26    | 119.1     | C24-C27-H27A   | 109.5     |
| C24-C27-H27B   | 109.5     | H27A-C27-H27B  | 109.5     |
| C24-C27-H27C   | 109.5     | H27A-C27-H27C  | 109.5     |
| H27B-C27-H27C  | 109.5     | N2-C28-C29     | 111.7(9)  |
| N2-C28-H28A    | 109.3     | C29-C28-H28A   | 109.3     |
| N2-C28-H28B    | 109.3     | C29-C28-H28B   | 109.3     |
| H28A-C28-H28B  | 107.9     | O3-C29-O4      | 126.0(10) |
| O3-C29-C28     | 125.0(10) | O4-C29-C28     | 109.0(10) |

**Table S13. Anisotropic atomic displacement parameters ( $\text{\AA}^2$ ) for D8\_2953\_HK\_BTolBr.**

The anisotropic atomic displacement factor exponent takes the form:  $-2\pi^2 [h^2 a^{*2} U_{11} + \dots + 2 h k a^* b^* U_{12}]$

|     | <b>U<sub>11</sub></b> | <b>U<sub>22</sub></b> | <b>U<sub>33</sub></b> | <b>U<sub>23</sub></b> | <b>U<sub>13</sub></b> | <b>U<sub>12</sub></b> |
|-----|-----------------------|-----------------------|-----------------------|-----------------------|-----------------------|-----------------------|
| Br1 | 0.0264(4)             | 0.0577(5)             | 0.0263(4)             | -0.0020(6)            | 0.0065(5)             | -0.0052(3)            |
| O1  | 0.047(5)              | 0.116(8)              | 0.216(16)             | 0.087(10)             | 0.003(7)              | -0.011(5)             |
| O2  | 0.041(4)              | 0.076(5)              | 0.079(6)              | 0.013(4)              | -0.022(4)             | -0.008(4)             |
| O3  | 0.057(5)              | 0.055(5)              | 0.052(5)              | -0.016(4)             | 0.019(4)              | -0.010(4)             |
| O4  | 0.026(3)              | 0.069(4)              | 0.034(3)              | -0.002(3)             | 0.004(3)              | -0.014(3)             |
| N1  | 0.020(3)              | 0.055(4)              | 0.042(4)              | 0.007(4)              | 0.005(3)              | 0.005(3)              |
| N2  | 0.030(4)              | 0.042(4)              | 0.021(4)              | -0.001(3)             | 0.004(3)              | -0.006(3)             |
| N3  | 0.046(5)              | 0.076(7)              | 0.137(11)             | 0.057(7)              | -0.015(6)             | -0.008(5)             |
| C1  | 0.024(4)              | 0.042(5)              | 0.029(4)              | 0.008(3)              | 0.000(3)              | -0.001(3)             |
| C2  | 0.013(4)              | 0.060(6)              | 0.055(6)              | 0.005(5)              | -0.001(4)             | -0.005(4)             |
| C3  | 0.025(4)              | 0.045(5)              | 0.035(5)              | -0.003(4)             | 0.009(3)              | -0.003(4)             |
| C4  | 0.019(4)              | 0.053(5)              | 0.036(5)              | -0.005(3)             | 0.004(3)              | -0.004(3)             |
| C5  | 0.022(4)              | 0.048(5)              | 0.079(9)              | 0.007(5)              | 0.005(5)              | -0.002(3)             |
| C6  | 0.037(5)              | 0.064(7)              | 0.117(14)             | 0.034(7)              | -0.002(6)             | -0.002(5)             |
| C7  | 0.020(4)              | 0.065(6)              | 0.125(15)             | 0.039(9)              | -0.001(6)             | -0.012(4)             |
| C8  | 0.062(8)              | 0.082(9)              | 0.137(14)             | 0.067(10)             | -0.006(8)             | -0.016(7)             |
| C9  | 0.035(5)              | 0.054(6)              | 0.082(8)              | 0.020(5)              | -0.006(5)             | -0.005(4)             |
| C10 | 0.053(8)              | 0.112(13)             | 0.158(18)             | 0.074(12)             | -0.001(10)            | 0.002(8)              |
| C11 | 0.042(7)              | 0.092(11)             | 0.24(2)               | 0.073(14)             | -0.032(11)            | -0.019(7)             |
| C12 | 0.061(9)              | 0.078(9)              | 0.18(2)               | 0.024(10)             | -0.019(10)            | -0.007(7)             |
| C13 | 0.071(7)              | 0.080(8)              | 0.355(19)             | -0.008(12)            | -0.040(12)            | 0.008(6)              |
| C14 | 0.077(8)              | 0.081(8)              | 0.360(19)             | -0.006(11)            | -0.043(11)            | 0.015(7)              |
| C15 | 0.066(6)              | 0.074(7)              | 0.360(18)             | 0.026(10)             | -0.051(10)            | -0.003(6)             |
| C16 | 0.046(7)              | 0.073(8)              | 0.34(2)               | 0.042(11)             | -0.049(10)            | -0.009(6)             |
| C17 | 0.071(9)              | 0.090(9)              | 0.34(2)               | 0.095(12)             | -0.062(12)            | -0.012(8)             |

|      | <b>U<sub>11</sub></b> | <b>U<sub>22</sub></b> | <b>U<sub>33</sub></b> | <b>U<sub>23</sub></b> | <b>U<sub>13</sub></b> | <b>U<sub>12</sub></b> |
|------|-----------------------|-----------------------|-----------------------|-----------------------|-----------------------|-----------------------|
| C18  | 0.069(8)              | 0.098(9)              | 0.353(19)             | 0.020(11)             | -0.055(11)            | 0.009(7)              |
| C19  | 0.081(8)              | 0.082(8)              | 0.374(18)             | 0.038(11)             | -0.058(11)            | -0.007(7)             |
| C20  | 0.070(7)              | 0.091(8)              | 0.355(18)             | 0.058(10)             | -0.067(10)            | -0.011(7)             |
| C21  | 0.022(4)              | 0.064(6)              | 0.034(5)              | 0.011(4)              | -0.005(4)             | 0.003(4)              |
| C22  | 0.021(7)              | 0.076(10)             | 0.084(12)             | -0.010(10)            | 0.015(8)              | -0.009(9)             |
| C23  | 0.023(8)              | 0.075(10)             | 0.081(12)             | -0.008(9)             | 0.015(7)              | -0.014(8)             |
| C22B | 0.029(7)              | 0.070(10)             | 0.083(11)             | -0.020(9)             | 0.016(7)              | -0.017(8)             |
| C23B | 0.035(7)              | 0.071(9)              | 0.083(11)             | -0.017(9)             | 0.010(7)              | -0.018(8)             |
| C24  | 0.016(5)              | 0.123(11)             | 0.062(8)              | -0.003(8)             | 0.009(5)              | 0.005(6)              |
| C25  | 0.041(6)              | 0.051(6)              | 0.145(14)             | -0.027(8)             | 0.032(7)              | 0.001(5)              |
| C26  | 0.032(6)              | 0.087(9)              | 0.141(14)             | -0.046(9)             | 0.022(7)              | 0.000(6)              |
| C27  | 0.016(5)              | 0.24(2)               | 0.105(13)             | -0.026(14)            | -0.001(6)             | -0.023(8)             |
| C28  | 0.024(4)              | 0.051(6)              | 0.020(4)              | 0.003(4)              | -0.006(4)             | -0.006(4)             |
| C29  | 0.028(5)              | 0.049(5)              | 0.029(5)              | -0.003(5)             | -0.006(4)             | -0.012(4)             |

**Table S14. Hydrogen atomic coordinates and isotropic atomic displacement parameters ( $\text{\AA}^2$ ) for D8\_2953\_HK\_BTolBr.**

|      | x/a     | y/b    | z/c    | U(eq) |
|------|---------|--------|--------|-------|
| H4   | 0.6284  | 0.7513 | 0.1280 | 0.064 |
| H1   | 0.2457  | 0.7260 | 0.2875 | 0.038 |
| H4A  | 0.5757  | 0.6892 | 0.4684 | 0.043 |
| H7   | 0.2452  | 0.6396 | 0.5034 | 0.084 |
| H10A | 0.5359  | 0.5936 | 0.8356 | 0.129 |
| H10B | 0.6473  | 0.6089 | 0.8136 | 0.129 |
| H12A | 0.6848  | 0.5911 | 0.5061 | 0.128 |
| H12B | 0.7731  | 0.5942 | 0.6207 | 0.128 |
| H13  | 0.8266  | 0.5625 | 0.4759 | 0.202 |
| H14A | 0.6540  | 0.5537 | 0.3853 | 0.207 |
| H14B | 0.7159  | 0.5259 | 0.4121 | 0.207 |
| H15  | 0.5389  | 0.5228 | 0.4983 | 0.2   |
| H16A | 0.4909  | 0.5521 | 0.6783 | 0.185 |
| H16B | 0.5132  | 0.5693 | 0.5468 | 0.185 |
| H17A | 0.7387  | 0.5645 | 0.8391 | 0.201 |
| H17B | 0.6271  | 0.5492 | 0.8530 | 0.201 |
| H18A | 0.8755  | 0.5471 | 0.6746 | 0.208 |
| H18B | 0.8410  | 0.5229 | 0.5782 | 0.208 |
| H19A | 0.5907  | 0.5101 | 0.7322 | 0.215 |
| H19B | 0.6749  | 0.4977 | 0.6283 | 0.215 |
| H20  | 0.7649  | 0.5193 | 0.7973 | 0.207 |
| H22  | 0.1384  | 0.6704 | 0.1812 | 0.072 |
| H23  | -0.0490 | 0.6684 | 0.1506 | 0.071 |
| H22B | 0.1429  | 0.6463 | 0.2445 | 0.073 |
| H23B | -0.0348 | 0.6347 | 0.2496 | 0.076 |

|      | <b>x/a</b> | <b>y/b</b> | <b>z/c</b> | <b>U(eq)</b> |
|------|------------|------------|------------|--------------|
| H25  | -0.1013    | 0.6984     | 0.4778     | 0.095        |
| H26  | 0.0766     | 0.7071     | 0.4986     | 0.104        |
| H27A | -0.2391    | 0.6634     | 0.4177     | 0.18         |
| H27B | -0.2216    | 0.6492     | 0.2768     | 0.18         |
| H27C | -0.2448    | 0.6808     | 0.2838     | 0.18         |
| H28A | 0.4881     | 0.7415     | 0.4174     | 0.038        |
| H28B | 0.4097     | 0.7505     | 0.2999     | 0.038        |
